# Supplementary material for: Efficient synthesis of α,β-dichlorinated ketones from α,β-dichlorinated Weinreb amides through a simple work-up procedure
Source: Royal Society of Chemistry journal article supplement (doi:10.1039/d1ob01379c), 2021-01-01
Supplement: d1ob01379c1.pdf [file d1ob01379c1.pdf]

#### General Methods.

The IR spectra were recorded on a JASCO FTIR-4100 Type A spectrometer using a NaCl cell. The  $^1\text{H}$  NMR and  $^{13}\text{C}$  NMR spectra were recorded using a JNM-EX 400 (400 MHz and 100 MHz) spectrometer. Chemical shifts were reported in ppm relative to  $\text{CHCl}_3$  in  $\text{CDCl}_3$  for  $^1\text{H}$  NMR ( $\delta = 7.26$ ) and  $^{13}\text{C}$  NMR ( $\delta = 77.0$ ) and  $\text{CHD}_2\text{OH}$  in  $\text{CD}_3\text{OD}$  for  $^1\text{H}$  NMR ( $\delta = 3.35$ ) and  $^{13}\text{C}$  NMR ( $\delta = 49.3$ ). Splitting patterns for  $^1\text{H}$  NMR were designated as “s, d, t, q, m, dt, dd, and td”. These symbols indicate “singlet, doublet, triplet, quartet, multiplet, doublettriplet, doubletdoublet, and tripletdoublet” respectively. All commercially obtained reagents were employed as received. Analytical TLC was carried out using pre-coated silica gel plates (Wako TLC Silicagel 70F<sub>254</sub>). Wakogel 60N 63-212  $\mu\text{m}$  was used for column chromatography. Reversed-phase high performance liquid chromatography (HPLC) was carried out using HPLC (NOMURA CHEMICAL, DEVELOSIL C30-UG 5  $\mu\text{m}$ ,  $\phi 8.0 \times 250$  mm).

#### Ketone **3a** and **4a**

To a solution of 1-hexyne (0.109 mL, 0.957 mmol) in THF (5.0 mL) was added *n*BuLi (0.601 mL, 0.957 mmol, 1.59 M) at 0 °C to give **1a**. After 30 minutes, a solution of **2** (111 mg, 0.319 mmol) in THF (3.0 mL) was added. The mixture was stirred for 10 minutes at 0 °C, quenched with 0.390 mL of 4.00 M HCl in 1,4-dioxane then excess of  $\text{H}_2\text{O}$ , extracted with EtOAc, washed with brine, dried over  $\text{Na}_2\text{SO}_4$ , filtered and concentrated *in vacuo*. The residue was purified by silica gel column chromatography (EtOAc:Hexane = 2:98) to give a mixture (116 mg, 98%) of dichloro ketone **3a** and unsaturated ketone **4a** with ratio 85:15. For further purification, the partial (ca. 10.0 mg) of mixture products were separated by HPLC (NOMURA CHEMICAL, DEVELOSIL C30-UG 5  $\mu\text{m}$ ,  $\phi 8.0 \times 250$  mm, elution with  $\text{H}_2\text{O}$ :Acetonitrile = 80:20 to 0:100 gradiently for 90 min, 2 mL/min) to afford **3a** as a colorless oil and **4a** as a colorless oil.

**3a**: IR (neat) 3019, 2960, 2936, 2214, 1726, 1683, 1647, 1215, 756, 699, 669  $\text{cm}^{-1}$ ;  $^1\text{H}$  NMR ( $\text{CD}_3\text{OD}$ , 400 MHz)  $\delta$  0.94 (3H, t,  $J = 7.3$  Hz), 1.46-1.81 (9H, m), 2.06-2.18 (1H, m), 2.48 (2H, t,  $J = 6.8$  Hz), 3.51 (2H, t,  $J = 5.8$  Hz), 4.35 (1H, td,  $J = 9.2, 2.4$  Hz), 4.46 (1H, d,  $J = 8.8$  Hz), 4.49 (2H, s), 7.24-7.33 (5H, m);  $^{13}\text{C}$  NMR ( $\text{CD}_3\text{OD}$ , 100 MHz)  $\delta$  13.7, 19.2, 22.9, 23.4, 29.9, 30.7, 34.4, 61.6, 66.9, 70.8, 73.9, 78.8, 100.2, 128.6, 128.8, 129.3, 139.8, 179.8; HRMS (ESI)  $m/z$ : [ $\text{M} + \text{Na}$ ] $^+$ ; Calcd for  $\text{C}_{20}\text{H}_{26}\text{O}_2\text{Cl}_2\text{Na}$  391.1202; Found 391.1201.

**4a**: IR (neat) 3065, 3019, 2959, 2936, 2865, 2214, 1716, 1649, 1617, 1216, 759, 698, 667  $\text{cm}^{-1}$ ;  $^1\text{H}$  NMR ( $\text{CD}_3\text{OD}$ , 400 MHz)  $\delta$  0.94 (3H, t,  $J = 7.3$  Hz), 1.43-1.50 (2H, m), 1.46-1.66 (6H, m), 2.45-2.52 (4H, m), 3.51 (2H, t,  $J = 6.3$  Hz), 4.49 (2H, s), 7.25-7.32 (5H, m), 7.46 (1H, t,  $J = 7.3$  Hz);  $^{13}\text{C}$  NMR ( $\text{CD}_3\text{OD}$ , 100 MHz)  $\delta$  13.8, 19.2, 23.0, 25.5, 30.3, 30.6, 30.8, 70.7, 73.9, 78.5, 98.6, 128.6, 128.8, 129.3, 136.1, 139.7, 149.3, 173.0; HRMS (ESI)  $m/z$ : [ $\text{M} + \text{Na}$ ] $^+$ ; Calcd for

C<sub>20</sub>H<sub>25</sub>O<sub>2</sub>ClNa 355.1435; Found 355.1438.

#### Ketone **3b**

To a solution of **2** (157 mg, 0.451 mmol) in THF (5.0 mL) was added *n*BuLi (**1b**) (0.427 mL, 0.680 mmol, 1.59 M) at -20 °C. The mixture was stirred for 30 minutes, quenched with 0.560 mL 4.00 M HCl in 1,4-dioxane then excess of H<sub>2</sub>O, extracted with EtOAc, washed with brine, dried over Na<sub>2</sub>SO<sub>4</sub>, filtered and concentrated *in vacuo*. The residue was purified by silica gel column chromatography (EtOAc:Hexane = 2:98) to give a mixture (155 mg, 98%) of dichloro ketone **3b** and unsaturated ketone **4b**. For further purification to obtain pure **3b**, a partial (ca. 10.0 mg) of the mixture was separated by HPLC (NOMURA CHEMICAL, DEVELOSIL C30-UG 5 μm, φ8.0×250 mm, elution with H<sub>2</sub>O:Acetonitrile = 80:20 to 0:100 gradiently for 90 min, 2 mL/min) to afford **3b** as a colorless oil: IR (neat) 3063, 3029, 2957, 2933, 2868, 1729, 1495, 1454, 1103, 735, 698, 664 cm<sup>-1</sup>; <sup>1</sup>H NMR (CD<sub>3</sub>OD, 400 MHz) δ 0.91 (3H, t, *J* = 7.3 Hz), 1.31-1.38 (2H, m), 1.53-1.79 (7H, m), 2.08-2.10 (1H, m), 2.64-2.75 (2H, m), 3.50 (2H, t, *J* = 5.8 Hz), 4.32 (1H, td, *J* = 9.2, 2.4 Hz), 4.49 (2H, s), 4.51 (1H, d, *J* = 8.7 Hz), 7.24-7.33 (5H, m); <sup>13</sup>C NMR (CD<sub>3</sub>OD, 100 MHz) δ 14.1, 23.1, 23.3, 26.4, 29.9, 34.6, 40.7, 61.5, 64.3, 70.9, 73.9, 128.6, 128.8, 129.3, 139.7, 203.7; HRMS (ESI) *m/z*: [M + Na]<sup>+</sup>; Calcd for C<sub>18</sub>H<sub>26</sub>O<sub>2</sub>Cl<sub>2</sub>Na 367.1202; Found 367.1202.

#### Ketone **3c**

To a solution of **2** (50.0 mg, 0.144 mmol) in THF (2.0 mL) was added PhLi (**1c**) (0.120 mL, 0.216 mmol, 1.80 M) at -20 °C. The mixture was stirred for 30 minutes, quenched with 0.200 mL 4.00 M HCl in 1,4-dioxane then excess of H<sub>2</sub>O, extracted with EtOAc, washed with brine, dried over Na<sub>2</sub>SO<sub>4</sub>, filtered and concentrated *in vacuo*. The residue was purified by silica gel column chromatography (EtOAc:Hexane = 2:98) to give a mixture (49.0 mg, 94%) of dichloro ketone **3c** and unsaturated ketone **4c**. For further purification to obtain pure **3c**, a partial (ca. 10.0 mg) of the mixture was separated by HPLC (NOMURA CHEMICAL, DEVELOSIL C30-UG 5 μm, φ8.0×250 mm, elution with H<sub>2</sub>O:Acetonitrile = 80:20 to 0:100 gradiently for 90 min, 2 mL/min) to afford **3c** as a colorless oil: IR (neat) 3062, 3030, 2941, 2864, 1695, 1596, 1580, 1449, 1100, 738, 688, 663 cm<sup>-1</sup>; <sup>1</sup>H NMR (CD<sub>3</sub>OD, 400 MHz) δ 1.27-1.93 (5H, m), 2.24-2.30 (1H, m), 3.53 (2H, t, *J* = 5.8 Hz), 4.50 (2H, s), 4.51 (1H, td, *J* = 9.2, 2.4 Hz), 5.53 (1H, d, *J* = 9.7 Hz), 7.24-7.33 (5H, m), 7.54 (2H, dd, *J* = 8.7, 7.8 Hz), 7.64-7.68 (1H, m), 8.05 (2H, dd, *J* = 7.3, 1.4 Hz); <sup>13</sup>C NMR (CD<sub>3</sub>OD, 100 MHz) δ 23.3, 30.0, 34.5, 58.5, 61.4, 70.9, 73.9, 127.7, 128.6, 128.8, 129.3, 130.0, 135.3, 136.0, 139.7, 193.2; HRMS (ESI) *m/z*: [M + Na]<sup>+</sup>; Calcd for C<sub>20</sub>H<sub>22</sub>O<sub>2</sub>Cl<sub>2</sub>Na 387.0889; Found 387.0888.

### Ketone **3d**

To a solution of **2** (114 mg, 0.327 mmol) in THF (4.0 mL) was added CH<sub>3</sub>MgBr (**1d**) (0.163 mL, 0.491 mmol, 3.00 M) at 0 °C. The mixture was stirred for 2 hours, quenched with 0.460 mL 4.00 M HCl in 1,4-dioxane then excess of H<sub>2</sub>O, extracted with EtOAc, washed with brine, dried over Na<sub>2</sub>SO<sub>4</sub>, filtered and concentrated *in vacuo*. The residue was purified by silica gel column chromatography (EtOAc:Hexane = 2:98) to give a mixture (97.0 mg, 98%) of dichloro ketone **3d** and unsaturated ketone **4d**. For further purification to obtain pure **3d**, a partial (ca. 10.0 mg) of the mixture was separated by HPLC (NOMURA CHEMICAL, DEVELOSIL C30-UG 5 μm, φ8.0×250 mm, elution with H<sub>2</sub>O:Acetonitrile = 80:20 to 0:100 gradiently for 90 min, 2 mL/min) to afford **3d** as a colorless oil: IR (neat) 3031, 2940, 2866, 1721, 1495, 1454, 1100, 739, 714, 698 cm<sup>-1</sup>; <sup>1</sup>H NMR (CD<sub>3</sub>OD, 400 MHz) δ 1.53-1.80 (5H, m), 2.07-2.17 (1H, m), 2.31 (3H, s), 3.50 (2H, t, *J* = 5.8 Hz), 4.33 (1H, td, *J* = 9.2, 2.4 Hz), 4.49 (2H, s), 4.50 (1H, d, *J* = 7.3 Hz), 7.26-7.34 (5H, m); <sup>13</sup>C NMR (CD<sub>3</sub>OD, 100 MHz) δ 23.4, 26.9, 29.9, 34.6, 61.6, 65.4, 70.9, 73.9, 128.6, 128.8, 129.3, 139.7, 201.4; HRMS (ESI) *m/z*: [M + Na]<sup>+</sup>; Calcd for C<sub>15</sub>H<sub>20</sub>O<sub>2</sub>Cl<sub>2</sub>Na 325.0732; Found 325.0728.

### Ketone **3e**

To a solution of **2** (131 mg, 0.376 mmol) in THF (4.0 mL) was added VinylMgCl (**1e**) (0.427 mL, 0.680 mmol, 1.35 M) at 0 °C. The mixture was stirred for 2 hours, quenched with 0.460 mL 4.00 M HCl in 1,4-dioxane then excess of H<sub>2</sub>O, extracted with EtOAc, washed with brine, dried over Na<sub>2</sub>SO<sub>4</sub>, filtered and concentrated *in vacuo*. The residue was purified by silica gel column chromatography (EtOAc:Hexane = 2:98) to give a mixture (115 mg, 97%) of dichloro ketone **3e** and unsaturated ketone **4e**. For further purification to obtain pure **3e**, a partial (ca. 10.0 mg) of the mixture was separated by HPLC (NOMURA CHEMICAL, DEVELOSIL C30-UG 5 μm, φ8.0×250 mm, elution with H<sub>2</sub>O:Acetonitrile = 80:20 to 0:100 gradiently for 90 min, 2 mL/min) to afford **3e** as a colorless oil: IR (neat) 3063, 3029, 2930, 2866, 1725, 1558, 1455, 1275, 1101, 714, 700, 667 cm<sup>-1</sup>; <sup>1</sup>H NMR (CDCl<sub>3</sub>, 400 MHz) δ 1.61-1.81 (5H, m), 2.13-2.17 (1H, m), 3.50 (2H, t, *J* = 5.8 Hz), 4.31 (1H, td, *J* = 9.2, 2.4 Hz), 4.49 (2H, s), 4.51 (1H, d, *J* = 8.8 Hz), 5.96 (1H, dd, *J* = 10.4, 0.9 Hz), 6.45 (1H, dd, *J* = 17.5, 0.9 Hz), 6.62 (1H, dd, *J* = 17.5, 10.2 Hz), 7.26-7.35 (5H, m); <sup>13</sup>C NMR (CDCl<sub>3</sub>, 100 MHz) δ 22.2, 29.1, 33.6, 59.7, 61.5, 69.8, 72.9, 127.5, 127.6, 128.3, 131.5, 132.1, 138.4, 190.7; HRMS (ESI) *m/z*: [M + Na]<sup>+</sup>; Calcd for C<sub>16</sub>H<sub>20</sub>O<sub>2</sub>Cl<sub>2</sub>Na 337.0732; Found 337.0728.

### Ketone **3f**

To a solution of **2** (110 mg, 0.315 mmol) in THF (5.0 mL) was added  $n\text{C}_5\text{H}_{11}\text{MgBr}$  (**1f**) (0.236 mL, 0.473 mmol, 2.00 M) at 0 °C. The mixture was stirred for 2 hours, quenched with 0.390 mL 4.00 M HCl in 1,4-dioxane then excess of  $\text{H}_2\text{O}$ , extracted with EtOAc, washed with brine, dried over  $\text{Na}_2\text{SO}_4$ , filtered and concentrated *in vacuo*. The residue was purified by silica gel column chromatography (EtOAc:Hexane = 2:98) to give a mixture (109 mg, 96%) of dichloro ketone **3f** and unsaturated ketone **4f**. For further purification to obtain pure **3f**, a partial (ca. 10.0 mg) of the mixture was separated by HPLC (NOMURA CHEMICAL, DEVELOSIL C30-UG 5  $\mu\text{m}$ ,  $\phi 8.0 \times 250$  mm, elution with  $\text{H}_2\text{O}$ :Acetonitrile = 80:20 to 0:100 gradiently for 90 min, 2 mL/min) to afford **3f** as a colorless oil: IR (neat) 3064, 3031, 2931, 2862, 1730, 1558, 1455, 1274, 1101, 739, 698, 663  $\text{cm}^{-1}$ ;  $^1\text{H}$  NMR ( $\text{CD}_3\text{OD}$ , 400 MHz)  $\delta$  0.90 (3H, t,  $J = 6.8$  Hz), 1.27-1.36 (4H, m), 1.53-1.79 (7H, m), 2.07-2.16 (1H, m), 2.63-2.74 (2H, m), 3.51 (2H, t,  $J = 5.8$  Hz), 4.32 (1H, td,  $J = 9.2, 2.4$  Hz), 4.49 (2H, s), 4.51 (1H, d,  $J = 9.3$  Hz), 7.23-7.33 (5H, m);  $^{13}\text{C}$  NMR ( $\text{CD}_3\text{OD}$ , 100 MHz)  $\delta$  14.3, 23.3, 23.5, 24.1, 29.9, 32.2, 34.6, 40.9, 61.5, 64.3, 70.9, 73.9, 128.6, 128.8, 129.3, 139.7, 203.7; HRMS (ESI)  $m/z$ :  $[\text{M} + \text{Na}]^+$ ; Calcd for  $\text{C}_{19}\text{H}_{28}\text{O}_2\text{Cl}_2\text{Na}$  381.1358; Found 381.1353.

### Ketone **3g**

To a solution of **2** (111 mg, 0.319 mmol) in THF (4.0 mL) was added  $\text{PhMgBr}$  (**1g**) (0.159 mL, 0.478 mmol, 3.00 M) at 0 °C. The mixture was stirred for 4 hours, quenched with 0.390 mL 4.00 M HCl in 1,4-dioxane then excess of  $\text{H}_2\text{O}$ , extracted with EtOAc, washed with brine, dried over  $\text{Na}_2\text{SO}_4$ , filtered and concentrated *in vacuo*. The residue was purified by silica gel column chromatography (EtOAc:Hexane = 2:98) to give a mixture (111 mg, 96%) of dichloro ketone **3g** and unsaturated ketone **4g**. For further purification to obtain pure **3g**, a partial (ca. 10.0 mg) of the mixture was separated by HPLC (NOMURA CHEMICAL, DEVELOSIL C30-UG 5  $\mu\text{m}$ ,  $\phi 8.0 \times 250$  mm, elution with  $\text{H}_2\text{O}$ :Acetonitrile = 80:20 to 0:100 gradiently for 90 min, 2 mL/min) to afford **3g** as a colorless oil: IR (neat) 3063, 3030, 2939, 2865, 1695, 1596, 1580, 1449, 1273, 1100, 746, 688, 663  $\text{cm}^{-1}$ ;  $^1\text{H}$  NMR ( $\text{CD}_3\text{OD}$ , 400 MHz)  $\delta$  1.27-1.93 (5H, m), 2.24-2.30 (1H, m), 3.53 (2H, t,  $J = 5.8$  Hz), 4.50 (2H, s), 4.51 (1H, td,  $J = 9.2, 2.4$  Hz), 5.53 (1H, d,  $J = 9.7$  Hz), 7.24-7.33 (5H, m), 7.54 (2H, dd,  $J = 8.7, 7.8$  Hz), 7.64-7.68 (1H, m), 8.05 (2H, dd,  $J = 7.3, 1.4$  Hz);  $^{13}\text{C}$  NMR ( $\text{CD}_3\text{OD}$ , 100 MHz)  $\delta$  23.3, 30.0, 34.5, 58.5, 61.4, 70.9, 73.9, 127.7, 128.6, 128.8, 129.3, 130.0, 135.3, 136.0, 139.7, 193.2; HRMS (ESI)  $m/z$ :  $[\text{M} + \text{Na}]^+$ ; Calcd for  $\text{C}_{20}\text{H}_{22}\text{O}_2\text{Cl}_2\text{Na}$  387.0889; Found 387.0888.

### Ketone **3h** and **4h**



To a solution of **2** (64.2 mg, 0.184 mmol) in THF (2.0 mL) was added HC≡CMgCl (**1h**) (0.553 mL, 0.277 mmol, 0.500 M) at 0 °C. The mixture was stirred for 4 hours, quenched with 0.230 mL 4.00 M HCl in 1,4-dioxane then excess of H<sub>2</sub>O, extracted with EtOAc, washed with brine, dried over Na<sub>2</sub>SO<sub>4</sub>, filtered and concentrated *in vacuo*. The residue was purified by silica gel column chromatography (EtOAc:Hexane = 2:98) to give a mixture (52.0 mg, 90%) of dichloro ketone **3h** and unsaturated ketone **4h** with ratio 35:65. For further purification, the partial (ca. 10.0 mg) of mixture products were separated by HPLC (NOMURA CHEMICAL, DEVELOSIL C30-UG 5 μm, φ8.0×250 mm, elution with H<sub>2</sub>O:Acetonitrile = 80:20 to 0:100 gradiently for 90 min, 2 mL/min) to afford **3h** as a colorless oil and **4h** as a colorless oil.

**3h**: IR (neat) 3273, 3066, 2921, 2851, 2098, 1697, 1660, 1587, 1455, 1259, 1101, 909, 735, 698 cm<sup>-1</sup>; <sup>1</sup>H NMR (CDCl<sub>3</sub>, 400 MHz) δ 1.55-1.80 (5H, m), 2.10-2.16 (1H, m), 3.41 (1H, s), 3.50 (2H, t, *J* = 5.8 Hz), 4.31-4.32 (2H, m), 4.51 (2H, s), 7.25-7.35 (5H, m); <sup>13</sup>C NMR (CDCl<sub>3</sub>, 100 MHz) δ 22.1, 28.9, 33.3, 59.5, 64.8, 69.8, 72.9, 78.1, 82.5, 127.5, 127.6, 128.3, 138.4, 177.7; HRMS (ESI) *m/z*: [M + Na]<sup>+</sup>; Calcd for C<sub>16</sub>H<sub>18</sub>O<sub>2</sub>Cl<sub>2</sub>Na 335.0576; Found 335.0581.

**4h**: IR (neat) 3251, 3064, 2925, 2855, 2096, 1717, 1659, 1614, 1455, 1233, 1101, 883, 733, 698 cm<sup>-1</sup>; <sup>1</sup>H NMR (CDCl<sub>3</sub>, 400 MHz) δ 1.67-1.70 (4H, m), 2.53 (2H, q, *J* = 7.3 Hz), 3.34 (1H, s), 3.51 (2H, t, *J* = 5.8 Hz), 4.51 (2H, s), 7.26-7.35 (5H, m), 7.46 (1H, t, *J* = 7.3 Hz); <sup>13</sup>C NMR (CDCl<sub>3</sub>, 100 MHz) δ 24.3, 29.3, 29.8, 69.6, 72.9, 78.5, 81.3, 127.5, 127.5, 128.3, 134.9, 138.3, 149.3, 171.1; HRMS (ESI) *m/z*: [M + Na]<sup>+</sup>; Calcd for C<sub>16</sub>H<sub>17</sub>O<sub>2</sub>ClNa 299.0809; Found 299.0801.

#### Amide **6**

To a solution of **2** (182 mg, 0.524 mmol) in THF (6.0 mL) was added *i*PrMgBr (**1i**) (1.07 mL, 0.786 mmol, 0.730 M) at 0 °C. The mixture was stirred for 4 hours, quenched with 0.650 mL 4.00 M HCl in 1,4-dioxane then excess of H<sub>2</sub>O, extracted with EtOAc, washed with brine, dried over Na<sub>2</sub>SO<sub>4</sub>, filtered and concentrated *in vacuo*. The residue was purified by silica gel column chromatography (EtOAc:Hexane = 2:98) to give unsaturated amide **6** (135 mg, 0.487 mmol, 93%) as a colorless oil: IR (neat) 3063, 3029, 2936, 2857, 1664, 1633, 1495, 1455, 1412, 1379, 1273, 1104, 997, 746, 737, 698 cm<sup>-1</sup>; <sup>1</sup>H NMR (CDCl<sub>3</sub>, 400 MHz) δ 1.54-1.60 (2H, m), 1.61-1.67 (2H, m), 2.25 (2H, q, *J* = 7.3 Hz), 3.23 (3H, s), 3.48 (2H, t, *J* = 6.3 Hz), 3.68 (3H, s), 4.49 (2H, s), 6.39 (1H, d, *J* = 15.6 Hz), 6.97 (1H, dt, *J* = 15.7, 6.8 Hz), 7.26-7.34 (5H, m); <sup>13</sup>C NMR (CDCl<sub>3</sub>, 100 MHz) δ 24.8, 29.1, 32.1, 32.7, 61.5, 69.8, 72.7, 118.7, 127.4, 127.5, 128.2, 138.3, 147.4, 166.8; HRMS (ESI) *m/z*: [M + Na]<sup>+</sup>; Calcd for C<sub>16</sub>H<sub>23</sub>NO<sub>3</sub>Na 300.1567; Found 300.1567.

#### Ketone **8a**

To a solution of 1-hexyne (0.083 mL, 0.722 mmol) in THF (4.0 mL) was added *n*BuLi (0.453 mL,

0.722 mmol, 1.59 M) at 0 °C to give **1a**. The mixture was cooled at -40 °C and added cold solution of **7** (84.0 mg, 0.241 mmol) in THF (3.0 mL), stirred for 10 minutes at -40 °C, quenched with 0.310 mL 4.00 M HCl in 1,4-dioxane then excess of H<sub>2</sub>O, extracted with EtOAc, washed with brine, dried over Na<sub>2</sub>SO<sub>4</sub>, filtered and concentrated *in vacuo*. The residue was purified by silica gel column chromatography (EtOAc:Hexane = 2:98) to give a mixture (84.0 mg, 95%) of dichloro ketone **8a** and unsaturated ketone **4a**. For further purification to obtain pure **8a**, a partial (ca. 10.0 mg) of the mixture was separated by HPLC (NOMURA CHEMICAL, DEVELOSIL C30-UG 5 μm, φ8.0×250 mm, elution with H<sub>2</sub>O:Acetonitrile = 80:20 to 0:100 gradiently for 90 min, 2 mL/min) to afford **8a** as a colorless oil: IR (neat) 3030, 2956, 2933, 2863, 2211, 1697, 1671, 1653, 1102, 771, 736, 698 cm<sup>-1</sup>; <sup>1</sup>H NMR (CD<sub>3</sub>OD, 400 MHz) δ 0.75 (3H, t, *J* = 7.3 Hz), 1.25-1.46 (8H, m), 1.71 (2H, q, *J* = 7.3 Hz), 2.29 (2H, t, *J* = 6.8 Hz), 3.32 (2H, t, *J* = 5.8 Hz), 4.30 (2H, s), 4.49 (1H, td, *J* = 7.1, 3.4 Hz), 4.70 (1H, d, *J* = 3.4 Hz), 7.26-7.33 (5H, m); <sup>13</sup>C NMR (CD<sub>3</sub>OD, 100 MHz) δ 13.7, 19.3, 22.9, 24.2, 29.9, 30.6, 36.6, 62.6, 70.8, 70.9, 73.9, 79.3, 101.1, 128.6, 128.8, 129.3, 139.7, 180.4; HRMS (ESI) *m/z*: [M + Na]<sup>+</sup>; Calcd for C<sub>20</sub>H<sub>26</sub>O<sub>2</sub>Cl<sub>2</sub>Na 391.1202; Found 391.1203.

#### Ketone **8b**

To a solution of **7** (54.0 mg, 0.155 mmol) in THF (2.0 mL) was added *n*BuLi (**1b**) (0.145 mL, 0.232 mmol, 1.59 M) at -40 °C. The mixture was stirred for 30 minutes, quenched with 0.200 mL 4.00 M HCl in 1,4-dioxane then excess of H<sub>2</sub>O, extracted with EtOAc, washed with brine, dried over Na<sub>2</sub>SO<sub>4</sub>, filtered and concentrated *in vacuo*. The residue was purified by silica gel column chromatography (EtOAc:Hexane = 2:98) to give a mixture (51.0 mg, 95%) of dichloro ketone **8b** and unsaturated ketone **4b**. For further purification to obtain pure **8b**, a partial (ca. 10.0 mg) of the mixture was separated by HPLC (NOMURA CHEMICAL, DEVELOSIL C30-UG 5 μm, φ8.0×250 mm, elution with H<sub>2</sub>O:Acetonitrile = 80:20 to 0:100 gradiently for 90 min, 2 mL/min) to afford **8b** as a colorless oil: IR (neat) 3063, 3030, 2956, 2933, 2865, 1717, 1540, 1455, 1397, 1100, 772, 737, 698 cm<sup>-1</sup>; <sup>1</sup>H NMR (CD<sub>3</sub>OD, 400 MHz) δ 0.91 (3H, t, *J* = 7.3 Hz), 1.28-1.37 (2H, m), 1.49-1.66 (6H, m), 1.86 (2H, q, *J* = 6.8 Hz), 2.71 (2H, t, *J* = 7.3 Hz), 3.50 (2H, t, *J* = 5.8 Hz), 4.48 (2H, s), 4.54 (1H, td, *J* = 7.1, 3.4 Hz), 4.77 (1H, d, *J* = 3.4 Hz), 7.24-7.33 (5H, m); <sup>13</sup>C NMR (CD<sub>3</sub>OD, 100 MHz) δ 14.2, 23.1, 24.2, 26.5, 29.9, 36.6, 40.7, 63.1, 69.6, 70.9, 73.9, 128.6, 128.8, 129.3, 139.7, 205.1; HRMS (ESI) *m/z*: [M + Na]<sup>+</sup>; Calcd for C<sub>18</sub>H<sub>26</sub>O<sub>2</sub>Cl<sub>2</sub>Na 367.1202; Found 367.1200.

#### Ketone **4c**

To a solution of **7** (87.0 mg, 0.249 mmol) in THF (3.0 mL) was added PhLi (**1c**) (0.207 mL, 0.373 mmol, 1.80 M) at  $-20\text{ }^{\circ}\text{C}$ . The mixture was stirred for 30 minutes, quenched with 0.310 mL 4.00 M HCl in 1,4-dioxane then excess of  $\text{H}_2\text{O}$ , extracted with EtOAc, washed with brine, dried over  $\text{Na}_2\text{SO}_4$ , filtered and concentrated *in vacuo*. The residue was purified by silica gel column chromatography (EtOAc:Hexane = 2:98) to give unsaturated ketone **4c** (65.0 mg, 0.197 mmol, 78%) as a colorless oil: IR (neat) 3063, 3031, 2941, 2861, 1718, 1688, 1670, 1449, 1273, 1177, 713, 696,  $666\text{ cm}^{-1}$ ;  $^1\text{H}$  NMR ( $\text{CD}_3\text{OD}$ , 400 MHz)  $\delta$  1.34-1.66 (4H, m), 2.49 (2H, td,  $J = 7.3, 6.8$  Hz), 3.50 (2H, t,  $J = 5.8$  Hz), 4.47 (2H, s), 6.70 (1H, t,  $J = 7.3$  Hz), 7.24-7.30 (5H, m), 7.47 (2H, dd,  $J = 8.7, 7.8$  Hz), 7.57-7.61 (1H, m), 7.65 (2H, dd,  $J = 7.3, 1.4$  Hz);  $^{13}\text{C}$  NMR ( $\text{CD}_3\text{OD}$ , 100 MHz)  $\delta$  25.5, 30.3, 30.5, 70.8, 73.9, 128.6, 128.8, 129.3, 129.6, 130.3, 133.7, 134.1, 138.2, 139.7, 147.1, 191.9; HRMS (ESI)  $m/z$ :  $[\text{M} + \text{Na}]^+$ ; Calcd for  $\text{C}_{20}\text{H}_{21}\text{O}_2\text{ClNa}$  351.1122; Found 351.1123.

#### Ketone **8d**

To a solution of **7** (88.0 mg, 0.253 mmol) in THF (3.0 mL) was added  $\text{CH}_3\text{MgBr}$  (**1d**) (0.126 mL, 0.378 mmol, 3.00 M) at  $-20\text{ }^{\circ}\text{C}$ . The mixture was stirred for 2 hours, quenched with 0.310 mL 4.00 M HCl in 1,4-dioxane then excess of  $\text{H}_2\text{O}$ , extracted with EtOAc, washed with brine, dried over  $\text{Na}_2\text{SO}_4$ , filtered and concentrated *in vacuo*. The residue was purified by silica gel column chromatography (EtOAc:Hexane = 2:98) to give a mixture (73.0 mg, 95%) of dichloro ketone **8d** and unsaturated ketone **4d**. For further purification to obtain pure **8d**, a partial (ca. 10.0 mg) of the mixture was separated by HPLC (NOMURA CHEMICAL, DEVELOSIL C30-UG 5  $\mu\text{m}$ ,  $\phi 8.0 \times 250$  mm, elution with  $\text{H}_2\text{O}$ :Acetonitrile = 80:20 to 0:100 gradiently for 90 min, 2 mL/min) to afford **8d** as a colorless oil: IR (neat) 3032, 2937, 2864, 1717, 1496, 1455, 1099, 1026, 737, 714,  $699\text{ cm}^{-1}$ ;  $^1\text{H}$  NMR ( $\text{CD}_3\text{OD}$ , 400 MHz)  $\delta$  1.40-1.55 (4H, m), 1.77-1.88 (2H, m), 2.24 (3H, s), 3.41 (2H, t,  $J = 5.8$  Hz), 4.39 (2H, s), 4.46 (1H, td,  $J = 9.2, 2.4$  Hz), 4.69 (1H, d,  $J = 2.9$  Hz), 7.16-7.23 (5H, m);  $^{13}\text{C}$  NMR ( $\text{CD}_3\text{OD}$ , 100 MHz)  $\delta$  24.2, 27.9, 29.9, 36.7, 62.8, 69.9, 70.9, 73.9, 128.6, 128.8, 129.3, 139.7, 202.9; HRMS (ESI)  $m/z$ :  $[\text{M} + \text{Na}]^+$ ; Calcd for  $\text{C}_{15}\text{H}_{20}\text{O}_2\text{Cl}_2\text{Na}$  325.0732; Found 325.0733.

#### Ketone **4e**

To a solution of **7** (71.4 mg, 0.205 mmol) in THF (3.0 mL) was added VinylMgCl (**1e**) (0.146 mL, 0.308 mmol, 2.10 M) at  $0\text{ }^{\circ}\text{C}$ . The mixture was stirred for 2 hours, quenched with 0.250 mL 4.00 M HCl in 1,4-dioxane then excess of  $\text{H}_2\text{O}$ , extracted with EtOAc, washed with brine, dried over  $\text{Na}_2\text{SO}_4$ , filtered and concentrated *in vacuo*. The residue was purified by silica gel column chromatography (EtOAc:Hexane = 2:98) to give unsaturated ketone **4e** (52.0 mg, 0.187 mmol, 90%) as a colorless oil: IR (neat) 3029, 2932, 2862, 1717, 1652, 1616, 1455, 1274, 1101, 714,

700  $\text{cm}^{-1}$ ;  $^1\text{H}$  NMR ( $\text{CD}_3\text{OD}$ , 400 MHz)  $\delta$  1.60-1.70 (4H, m), 2.42-2.52 (2H, m), 3.51 (2H, t,  $J = 5.8$  Hz), 4.48 (2H, s), 5.84 (1H, dd,  $J = 10.4, 1.9$  Hz), 6.31 (1H, dd,  $J = 16.8, 1.9$  Hz), 7.11 (1H, dd,  $J = 17.5, 10.2$  Hz), 7.18 (1H, t,  $J = 6.8$  Hz), 7.25-7.32 (5H, m);  $^{13}\text{C}$  NMR ( $\text{CD}_3\text{OD}$ , 100 MHz)  $\delta$  25.4, 30.3, 30.6, 70.8, 73.9, 128.6, 128.8, 129.3, 130.7, 131.9, 135.2, 139.7, 145.1, 185.7; HRMS (ESI)  $m/z$ :  $[\text{M} + \text{Na}]^+$ ; Calcd for  $\text{C}_{16}\text{H}_{19}\text{O}_2\text{ClNa}$  301.0965; Found 301.0959.

#### Ketone **8f**

To a solution of **7** (83.0 mg, 0.238 mmol) in THF (3.0 mL) was added  $n\text{C}_5\text{H}_{11}\text{MgBr}$  (**1f**) (0.178 mL, 0.358 mmol, 2.00 M) at  $-20$  °C. The mixture was stirred for 2 hours, quenched with 0.290 mL 4.00 M HCl in 1,4-dioxane then excess of  $\text{H}_2\text{O}$ , extracted with EtOAc, washed with brine, dried over  $\text{Na}_2\text{SO}_4$ , filtered and concentrated *in vacuo*. The residue was purified by silica gel column chromatography (EtOAc:Hexane = 2:98) to give a mixture (77.0 mg, 90%) of dichloro ketone **8f** and unsaturated ketone **4f**. For further purification to obtain pure **8f**, a partial (ca. 10.0 mg) of the mixture was separated by HPLC (NOMURA CHEMICAL, DEVELOSIL C30-UG 5  $\mu\text{m}$ ,  $\phi 8.0 \times 250$  mm, elution with  $\text{H}_2\text{O}$ :Acetonitrile = 80:20 to 0:100 gradiently for 90 min, 2 mL/min) to afford **8f** as a colorless oil: IR (neat) 3068, 3030, 2931, 2859, 1717, 1558, 1455, 1362, 1100, 772, 735, 697  $\text{cm}^{-1}$ ;  $^1\text{H}$  NMR ( $\text{CD}_3\text{OD}$ , 400 MHz)  $\delta$  0.90 (3H, t,  $J = 6.8$  Hz), 1.27-1.34 (4H, m), 1.48-1.66 (6H, m), 1.87 (2H, q,  $J = 6.8$  Hz), 2.70 (2H, t,  $J = 6.8$  Hz), 3.50 (2H, t,  $J = 5.8$  Hz), 4.48 (2H, s), 4.53 (1H, td,  $J = 6.8, 3.4$  Hz), 4.76 (1H, d,  $J = 2.9$  Hz), 7.24-7.33 (5H, m);  $^{13}\text{C}$  NMR ( $\text{CD}_3\text{OD}$ , 100 MHz)  $\delta$  14.2, 23.5, 24.1, 24.2, 29.9, 32.2, 36.6, 40.9, 63.0, 69.6, 70.9, 73.9, 128.6, 128.8, 129.3, 139.8, 205.0; HRMS (ESI)  $m/z$ :  $[\text{M} + \text{Na}]^+$ ; Calcd for  $\text{C}_{19}\text{H}_{28}\text{O}_2\text{Cl}_2\text{Na}$  381.1358; Found 381.1358.

#### Ketone **4g**

To a solution of **7** (103 mg, 0.295 mmol) in THF (3.0 mL) was added  $\text{PhMgBr}$  (**1g**) (0.147 mL, 0.442 mmol, 3.00 M) at  $-20$  °C. The mixture was stirred for 2 hours, quenched with 0.360 mL 4.00 M HCl in 1,4-dioxane then excess of  $\text{H}_2\text{O}$ , extracted with EtOAc, washed with brine, dried over  $\text{Na}_2\text{SO}_4$ , filtered and concentrated *in vacuo*. The residue was purified by silica gel column chromatography (EtOAc:Hexane = 2:98) to give unsaturated ketone **4g** (62.0 mg, 0.189 mmol, 74%) as a colorless oil: IR (neat) 3063, 3031, 2941, 2861, 1718, 1688, 1670, 1449, 1273, 1177, 713, 696, 666  $\text{cm}^{-1}$ ;  $^1\text{H}$  NMR ( $\text{CD}_3\text{OD}$ , 400 MHz)  $\delta$  1.34-1.66 (4H, m), 2.49 (2H, q,  $J = 6.8$  Hz), 3.50 (2H, t,  $J = 5.8$  Hz), 4.47 (2H, s), 6.70 (1H, t,  $J = 7.3$  Hz), 7.24-7.30 (5H, m), 7.47 (2H, dd,  $J = 8.7, 7.8$  Hz), 7.57-7.61 (1H, m), 7.65 (2H, dd,  $J = 7.3, 1.4$  Hz);  $^{13}\text{C}$  NMR ( $\text{CD}_3\text{OD}$ , 100 MHz)  $\delta$  25.5, 30.3, 30.5, 70.8, 73.9, 128.6, 128.8, 129.3, 129.6, 130.3, 133.7, 134.1, 138.2, 139.7, 147.1,

191.9; HRMS (ESI) m/z:  $[M + Na]^+$ ; Calcd for  $C_{20}H_{21}O_2ClNa$  351.1122; Found 351.1123.

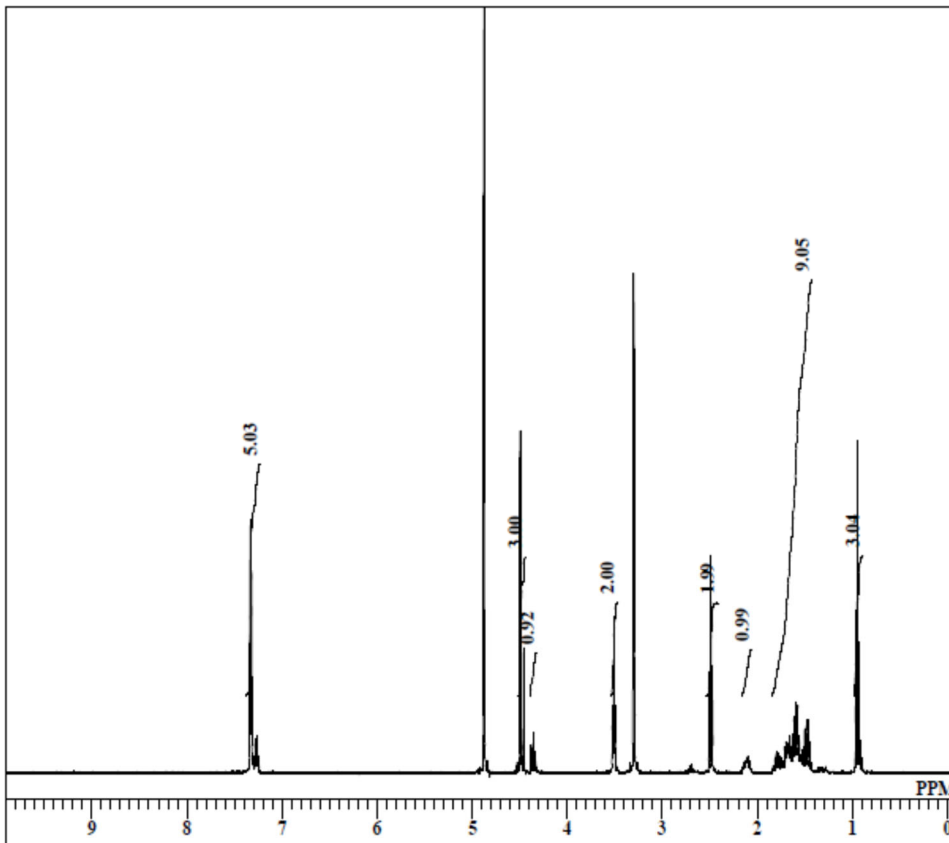

DFILE 20201229 Anti Cl Hexyne 1H.  
 COMNT 20201229 Anti Cl Hexyne 1H  
 DATIM Tue Dec 29 12:02:36 2020  
 OBNUC 1H  
 EXMOD NON  
 OBFRQ 399.65 MHz  
 OBSET 124.00 KHz  
 OBFIN 10500.00 Hz  
 POINT 16384  
 FREQU 7992.01 Hz  
 SCANS 4  
 ACQTM 2.0500 sec  
 PD 4.9500 sec  
 PW1 6.00 usec  
 IRNUC 1H  
 CTEMP 19.4 c  
 SLVNT CD3OD  
 EXREF 3.30 ppm  
 BF 0.12 Hz  
 RGAIN 23

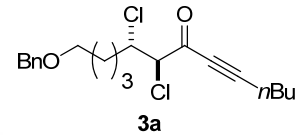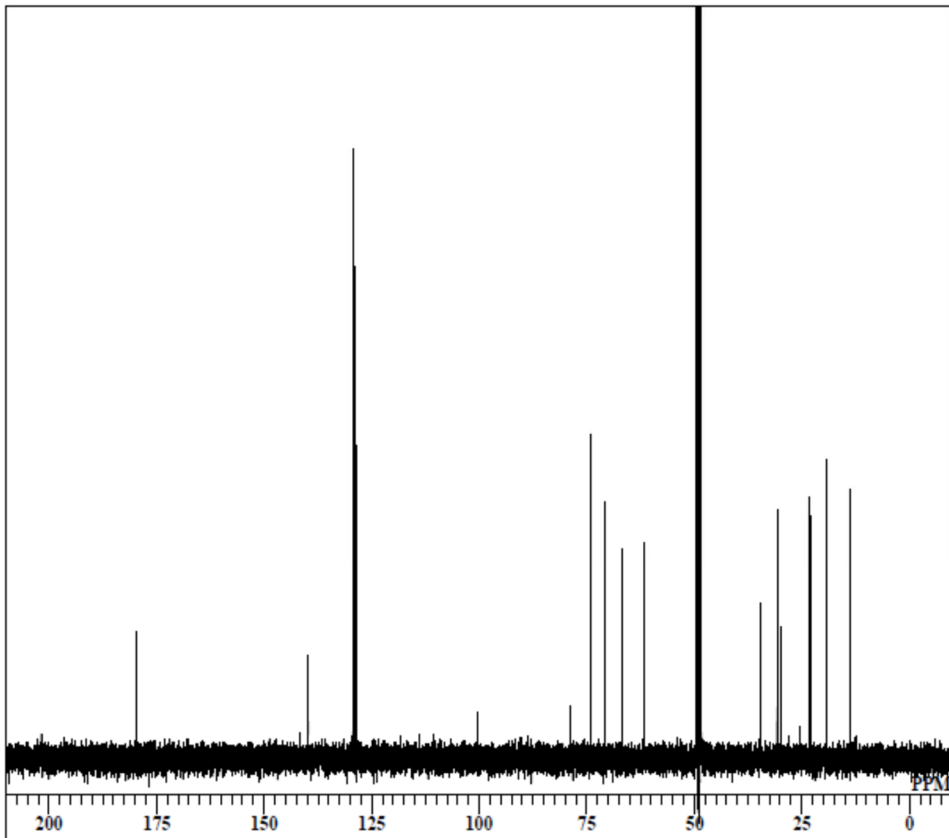

DFILE Reaction 110 Fraction 2 CNMB  
 COMNT Reaction 110 fraction 2 CNMB  
 DATIM Thu Mar 19 20:00:58 2020  
 OBNUC 13C  
 EXMOD BCM  
 OBFRQ 100.40 MHz  
 OBSET 125.00 KHz  
 OBFIN 10500.00 Hz  
 POINT 32768  
 FREQU 27118.64 Hz  
 SCANS 1200  
 ACQTM 1.2083 sec  
 PD 1.7920 sec  
 PW1 5.00 usec  
 IRNUC 1H  
 CTEMP 22.5 c  
 SLVNT CD3OD  
 EXREF 49.00 ppm  
 BF 0.10 Hz  
 RGAIN 29

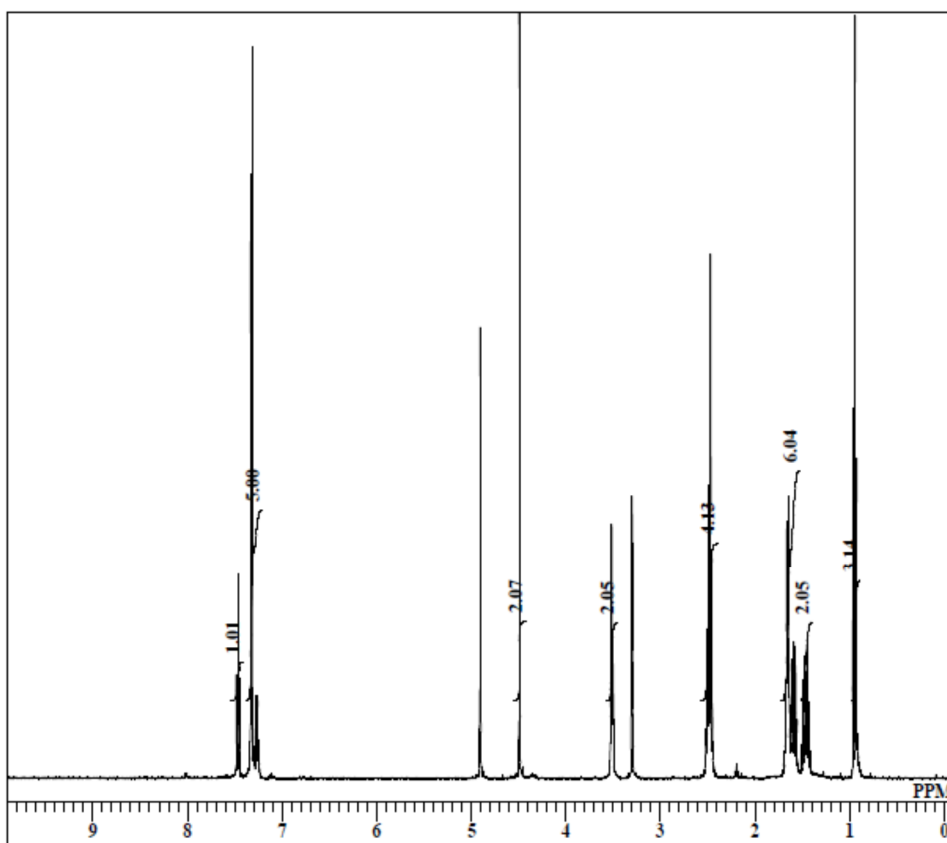

DFILE 20201228 Anti Cl Hexyne olefin  
 COMNT Anti Cl Hexyne kolom 2  
 DATIM Mon Dec 28 17:19:11 2020  
 OBNUC 1H  
 EXMOD NON  
 OBFRQ 399.65 MHz  
 OBSET 124.00 KHz  
 OBFIN 10500.00 Hz  
 POINT 16384  
 FREQU 7992.01 Hz  
 SCANS 4  
 ACQTM 2.0500 sec  
 PD 4.9500 sec  
 PW1 6.00 usec  
 IRNUC 1H  
 CTEMP 16.4 c  
 SLVNT CD3OD  
 EXREF 3.30 ppm  
 BF 0.12 Hz  
 RGAIN 21

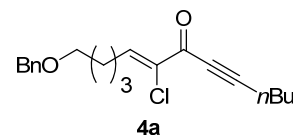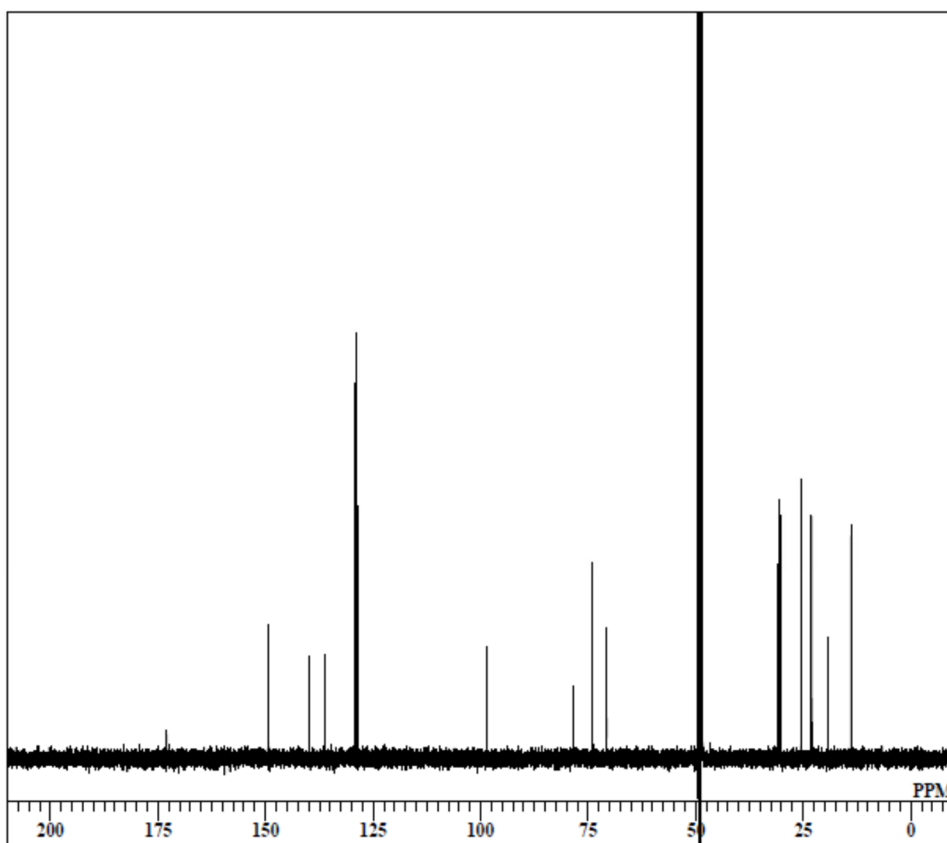

DFILE 20201228 Anti Cl Hexyne olefin  
 COMNT 20201228 Anti Cl Hexyne olefin  
 DATIM Mon Dec 28 21:13:56 2020  
 OBNUC 13C  
 EXMOD BCM  
 OBFRQ 100.40 MHz  
 OBSET 125.00 KHz  
 OBFIN 10500.00 Hz  
 POINT 32768  
 FREQU 27118.64 Hz  
 SCANS 2400  
 ACQTM 1.2083 sec  
 PD 1.7920 sec  
 PW1 5.00 usec  
 IRNUC 1H  
 CTEMP 16.5 c  
 SLVNT CD3OD  
 EXREF 49.00 ppm  
 BF 0.12 Hz  
 RGAIN 28

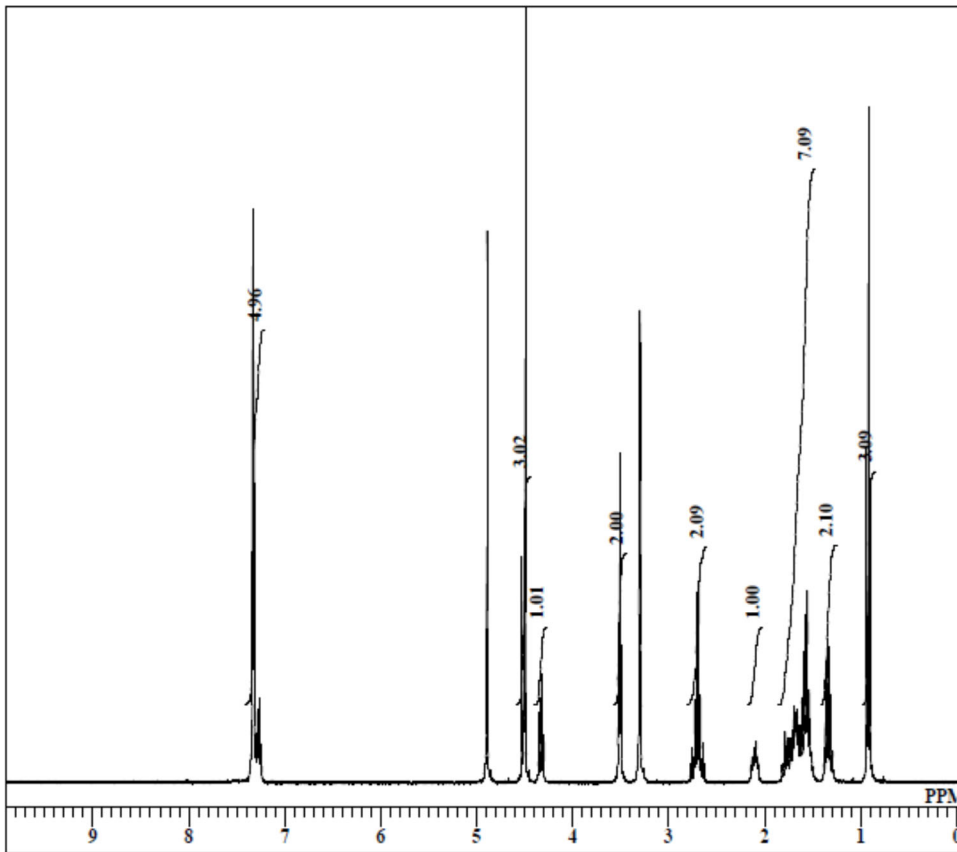

DFILE 20201229 Anti Cl n-Buli 1H  
 COMNT 20201229 Anti Cl n-Buli  
 DATIM Tue Dec 29 18:42:55 2020  
 OBNUC 1H  
 EXMOD NON  
 OBFREQ 399.65 MHz  
 OBSET 124.00 KHz  
 OBFIN 10500.00 Hz  
 POINT 16384  
 FREQU 7992.01 Hz  
 SCANS 8  
 ACQTM 2.0500 sec  
 PD 4.9500 sec  
 PW1 6.00 usec  
 IRNUC 1H  
 CTEMP 17.9 c  
 SLVNT CD3OD  
 EXREF 3.30 ppm  
 BF 0.10 Hz  
 RGAIN 22

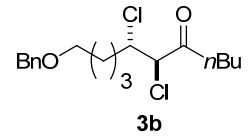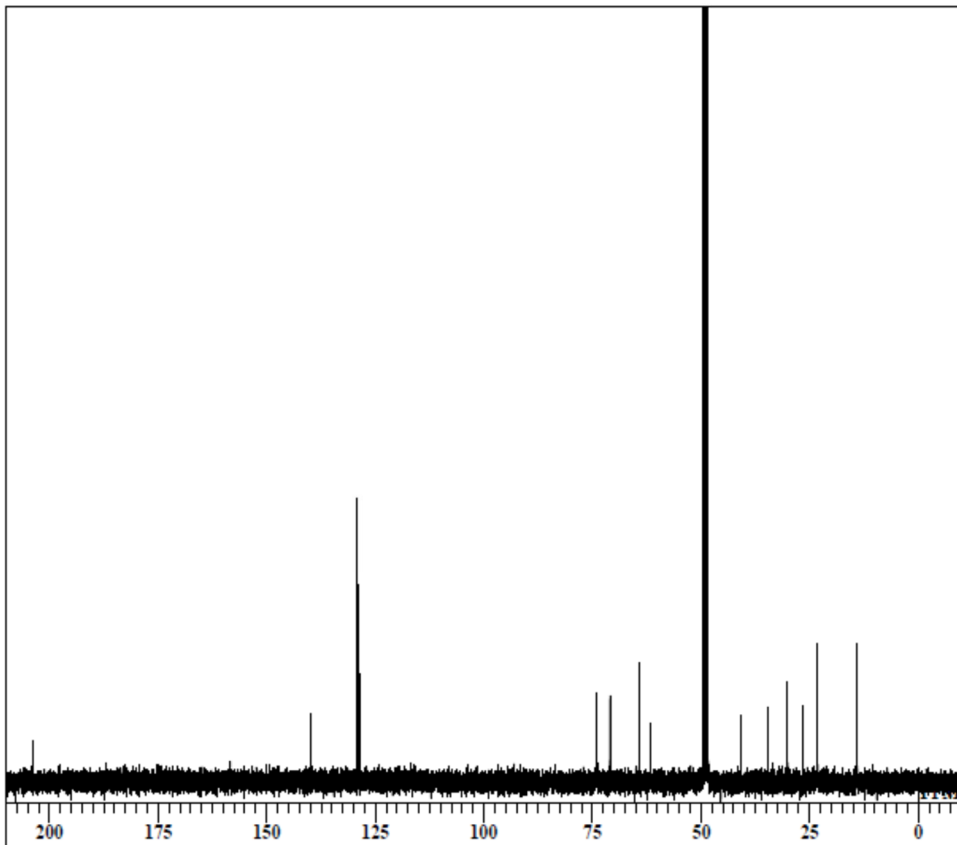

DFILE 20201229 Anti Cl n-Buli 13C.  
 COMNT 20201229 Anti Cl n-Buli 13C  
 DATIM Tue Dec 29 21:10:59 2020  
 OBNUC 13C  
 EXMOD BCM  
 OBFREQ 100.40 MHz  
 OBSET 125.00 KHz  
 OBFIN 10500.00 Hz  
 POINT 32768  
 FREQU 27118.64 Hz  
 SCANS 2500  
 ACQTM 1.2083 sec  
 PD 1.7920 sec  
 PW1 5.00 usec  
 IRNUC 1H  
 CTEMP 15.5 c  
 SLVNT CD3OD  
 EXREF 49.00 ppm  
 BF 0.10 Hz  
 RGAIN 28



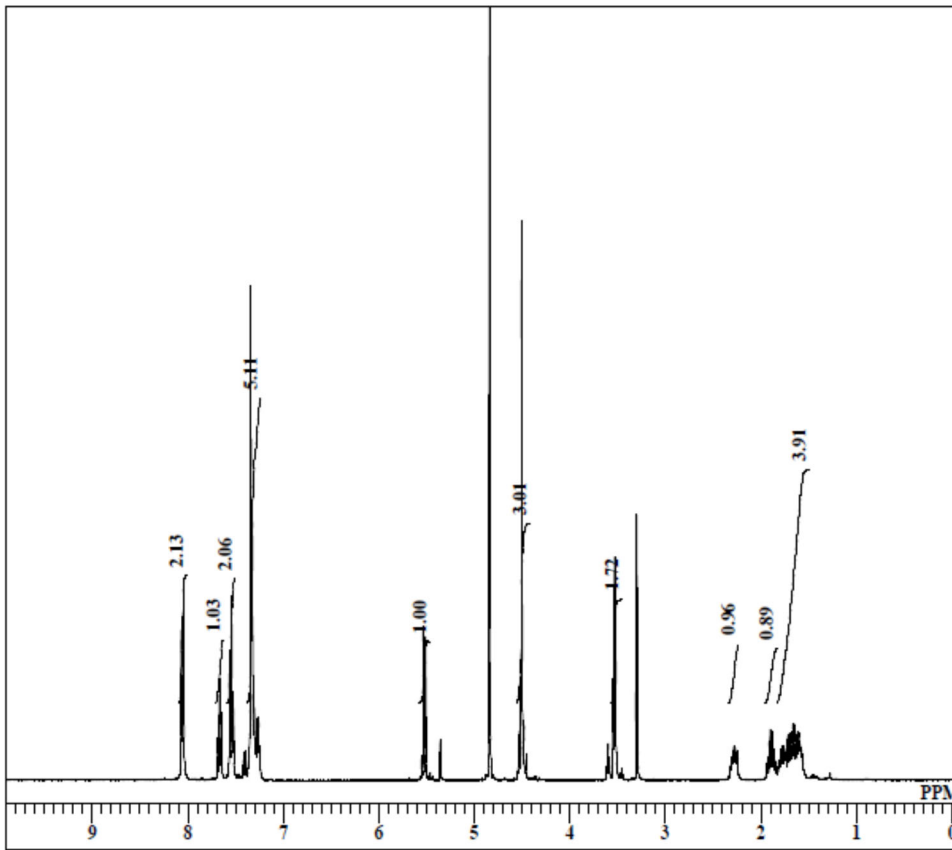

DFILE 20210222 AntiCl-PhLi 1H.als  
 COMNT 20210222 AntiCl-PhLi 1H  
 DATIM Mon Feb 22 13:55:55 2021  
 1H  
 OBNUC 1H  
 EXMOD NON  
 OBFRQ 399.65 MHz  
 OBSET 124.00 KHz  
 OBFIN 10500.00 Hz  
 POINT 16384  
 FREQU 7992.01 Hz  
 SCANS 8  
 ACQTM 2.0500 sec  
 PD 4.9500 sec  
 PW1 6.00 usec  
 IRNUC 1H  
 CTEMP 23.6 c  
 SLVNT CD3OD  
 EXREF 3.30 ppm  
 BF 0.12 Hz  
 RGAIN 20

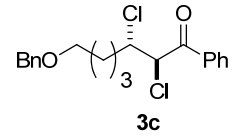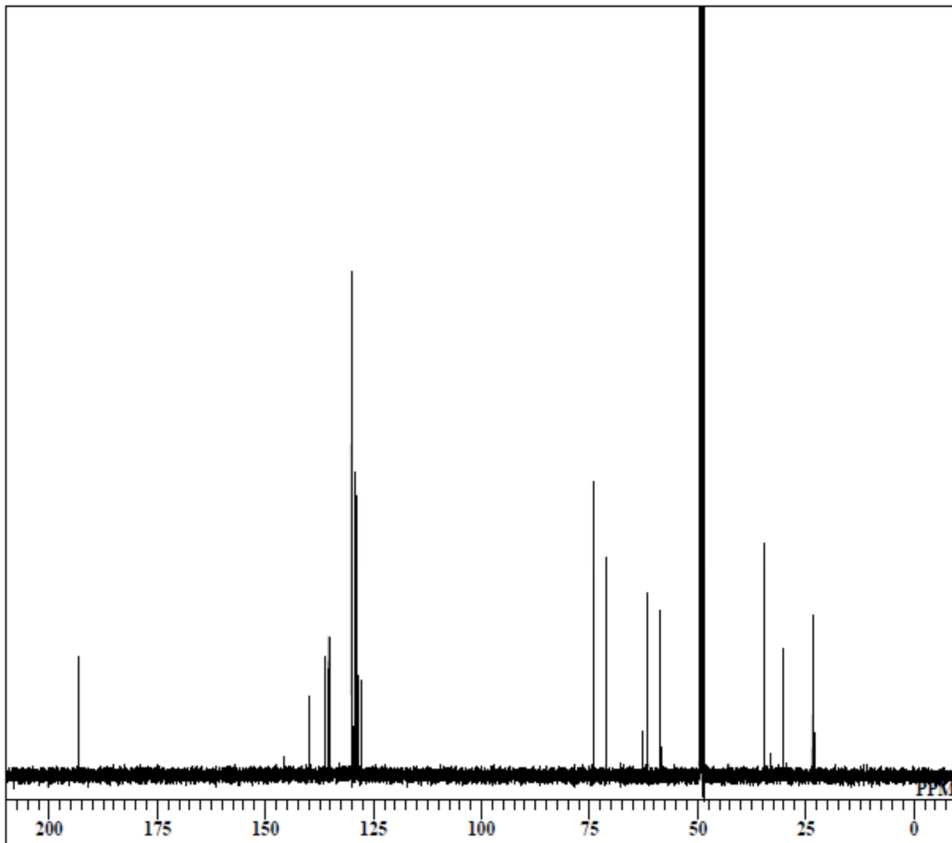

DFILE 20210222 AntiCl-PhLi 13C.als  
 COMNT 20210222 AntiCl-PhLi 13C  
 DATIM Tue Feb 23 16:00:28 2021  
 13C  
 OBNUC 13C  
 EXMOD BCM  
 OBFRQ 100.40 MHz  
 OBSET 125.00 KHz  
 OBFIN 10500.00 Hz  
 POINT 32768  
 FREQU 27118.64 Hz  
 SCANS 5000  
 ACQTM 1.2083 sec  
 PD 1.7920 sec  
 PW1 5.00 usec  
 IRNUC 1H  
 CTEMP 22.8 c  
 SLVNT CD3OD  
 EXREF 49.00 ppm  
 BF 0.12 Hz  
 RGAIN 29

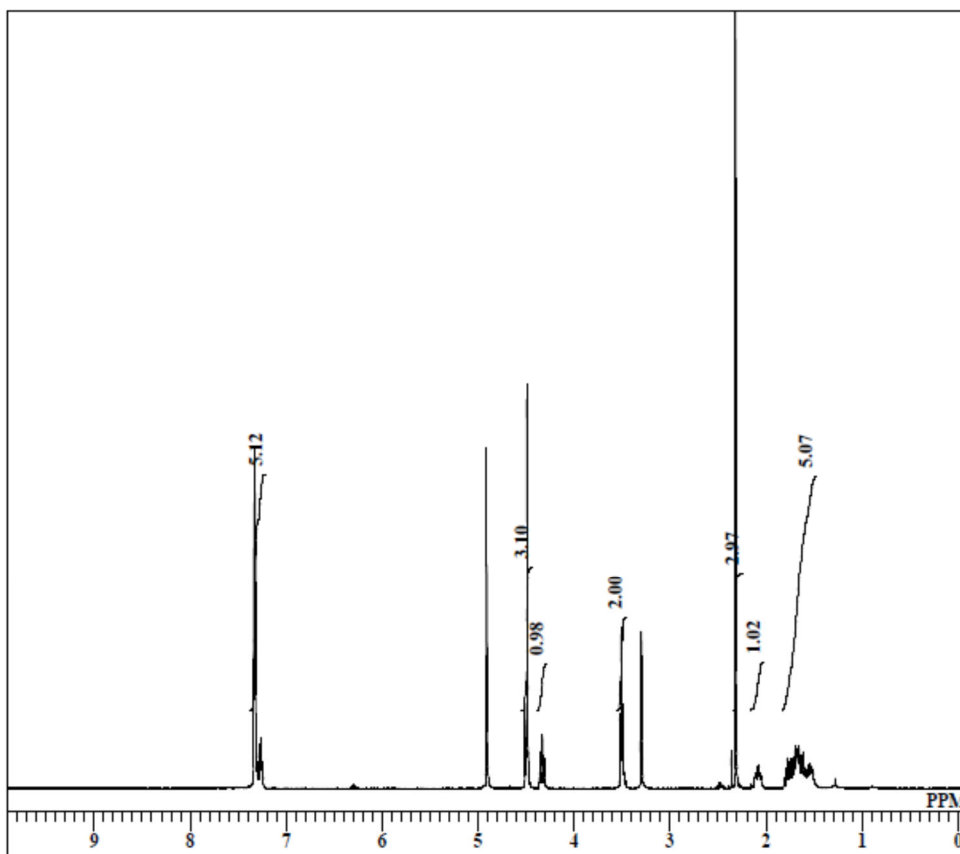

DFILE 20210114 AntiCl-Methyl1H.  
 COMNT 20210114 AntiCl-Methyl1H1  
 DATIM Thu Jan 14 20:57:28 2021  
 OBNUC 1H  
 EXMOD NON  
 OBFRQ 399.65 MHz  
 OBSET 124.00 KHz  
 OBFIN 10500.00 Hz  
 POINT 16384  
 FREQU 7992.01 Hz  
 SCANS 8  
 ACQTM 2.0500 sec  
 PD 4.9500 sec  
 PWI 6.00 usec  
 IRNUC 1H  
 CTEMP 15.7 c  
 SLVNT CD3OD  
 EXREF 3.30 ppm  
 BF 0.12 Hz  
 RGAIN 21

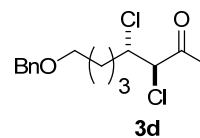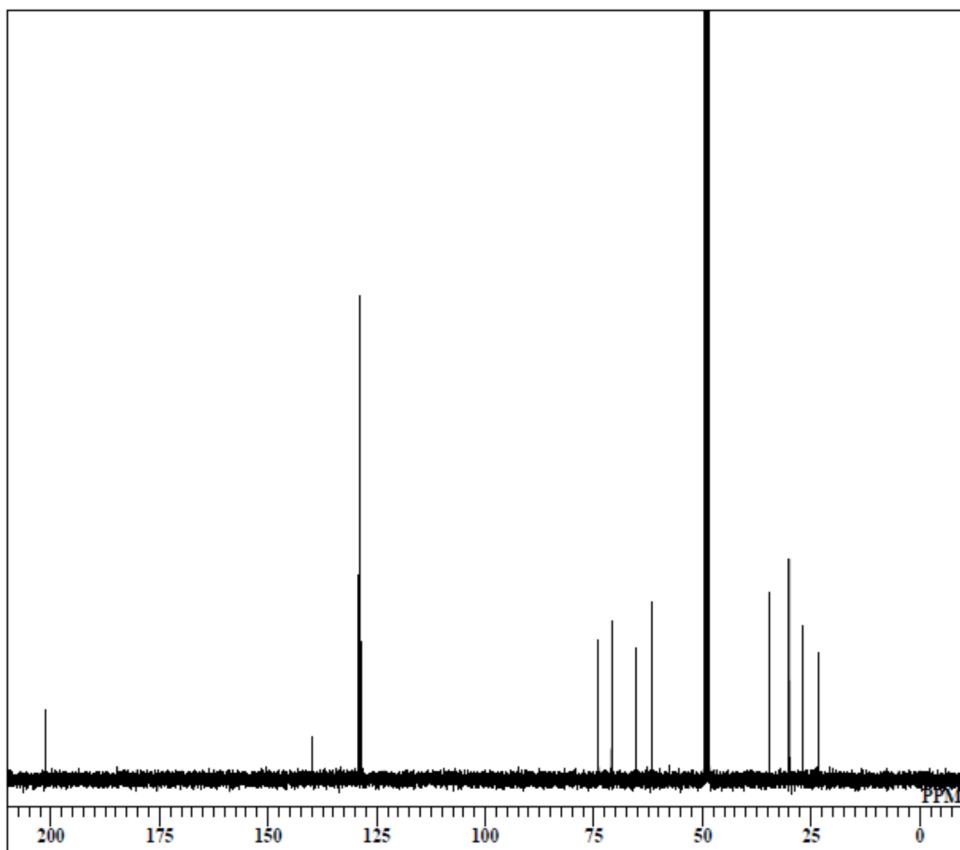

DFILE 20210114 AntiCl-Methyl13C.  
 COMNT 20210114 AntiCl-Methyl13C1  
 DATIM Fri Jan 15 19:01:16 2021  
 OBNUC 13C  
 EXMOD BCM  
 OBFRQ 100.40 MHz  
 OBSET 125.00 KHz  
 OBFIN 10500.00 Hz  
 POINT 32768  
 FREQU 27118.64 Hz  
 SCANS 2400  
 ACQTM 1.2083 sec  
 PD 1.7920 sec  
 PWI 5.00 usec  
 IRNUC 1H  
 CTEMP 15.6 c  
 SLVNT CD3OD  
 EXREF 49.00 ppm  
 BF 0.10 Hz  
 RGAIN 28

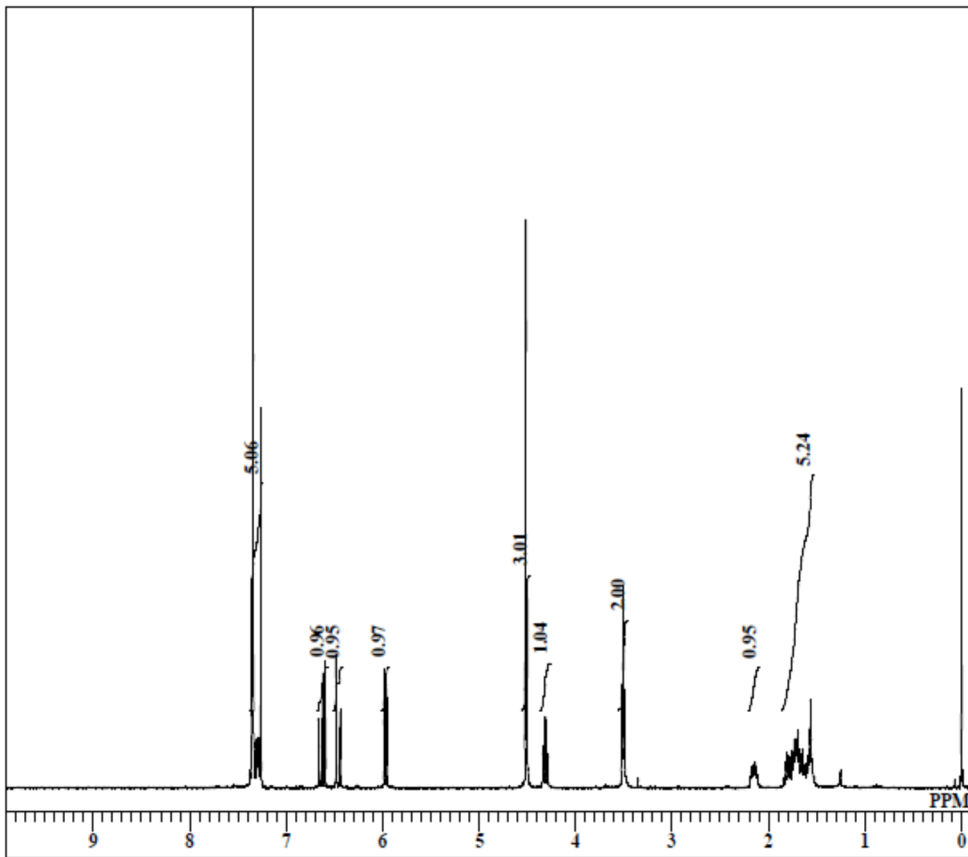

DFILE 20210114 AntiCl-Vinyl2.als  
 COMNT 20210114 AntiCl-Vinyl2  
 DATIM Thu Jan 14 12:43:58 2021  
 1H  
 OBNUC NON  
 EXMOD  
 OBFREQ 399.65 MHz  
 OBSET 124.00 KHz  
 OBFIN 10500.00 Hz  
 POINT 16384  
 FREQU 7992.01 Hz  
 SCANS 8  
 ACQTM 2.0500 sec  
 PD 4.9500 sec  
 PW1 6.00 usec  
 IRNUC 1H  
 CTEMP 17.8 c  
 SLVNT CDCL3  
 EXREF 0.00 ppm  
 BF 0.12 Hz  
 RGAIN 23

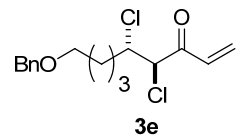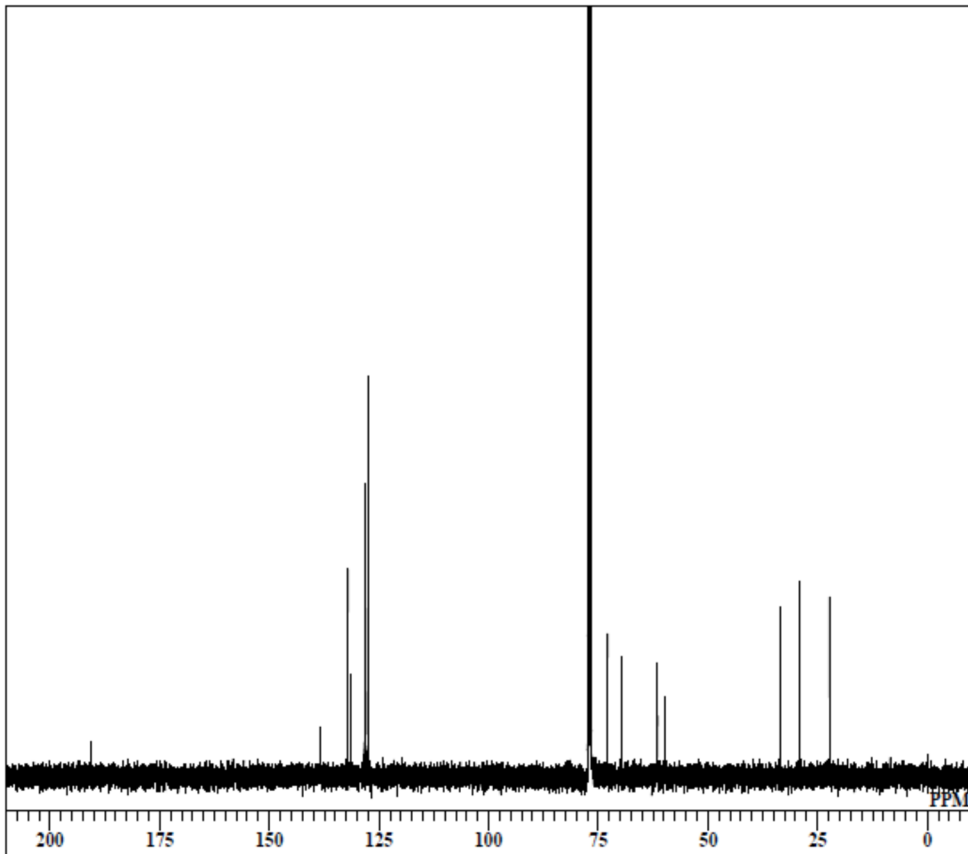

DFILE 20210114 AntiCl-Vinyl13C  
 COMNT 20210114 AntiCl-Vinyl13C  
 DATIM Thu Jan 14 20:30:05 2021  
 13C  
 OBNUC BCM  
 EXMOD  
 OBFREQ 100.40 MHz  
 OBSET 125.00 KHz  
 OBFIN 10500.00 Hz  
 POINT 32768  
 FREQU 27118.64 Hz  
 SCANS 2400  
 ACQTM 1.2083 sec  
 PD 1.7920 sec  
 PW1 5.00 usec  
 IRNUC 1H  
 CTEMP 15.8 c  
 SLVNT CDCL3  
 EXREF 77.00 ppm  
 BF 0.12 Hz  
 RGAIN 29

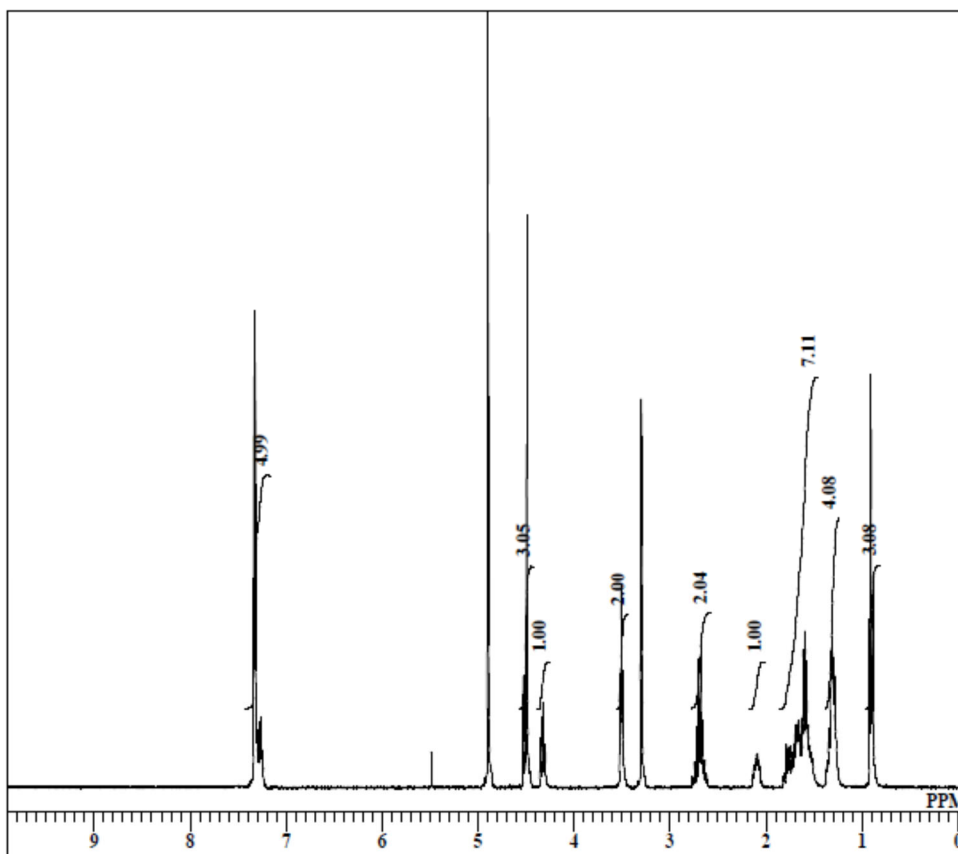

DFILE 20210116 AntiCl-pentyl-1H.  
 COMNT 20210116 AntiCl-pentyl-1H  
 DATIM Sat Jan 16 16:42:39 2021  
 OBNUC 1H  
 EXMOD NON  
 OBFRQ 399.65 MHz  
 OBSET 124.00 KHz  
 OBFIN 10500.00 Hz  
 POINT 16384  
 FREQU 7992.01 Hz  
 SCANS 8  
 ACQTM 2.0500 sec  
 PD 4.9500 sec  
 PW1 6.00 usec  
 IRNUC 1H  
 CTEMP 17.2 c  
 SLVNT CD3OD  
 EXREF 3.30 ppm  
 BF 0.10 Hz  
 RGAIN 21

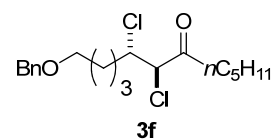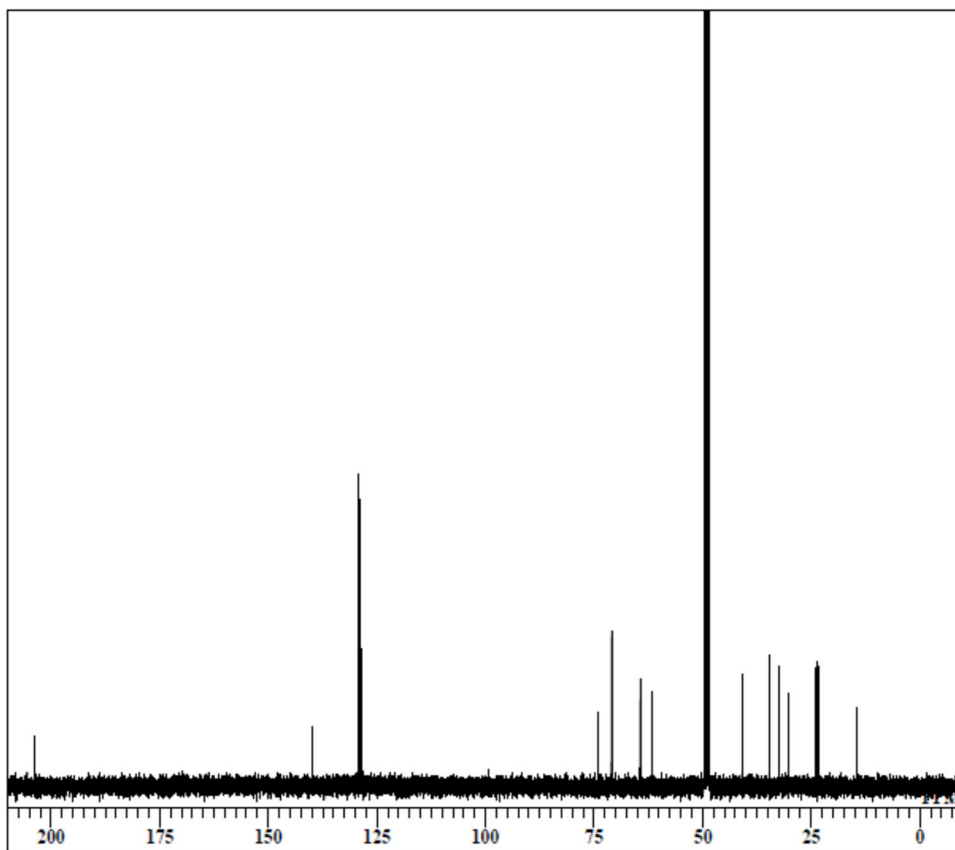

DFILE 20210116 AntiCl-pentyl-13C.  
 COMNT 20210116 AntiCl-pentyl-13C  
 DATIM Sat Jan 16 18:53:52 2021  
 OBNUC 13C  
 EXMOD BCM  
 OBFRQ 100.40 MHz  
 OBSET 125.00 KHz  
 OBFIN 10500.00 Hz  
 POINT 32768  
 FREQU 27118.64 Hz  
 SCANS 2500  
 ACQTM 1.2083 sec  
 PD 1.7920 sec  
 PW1 5.00 usec  
 IRNUC 1H  
 CTEMP 15.8 c  
 SLVNT CD3OD  
 EXREF 49.00 ppm  
 BF 0.10 Hz  
 RGAIN 28

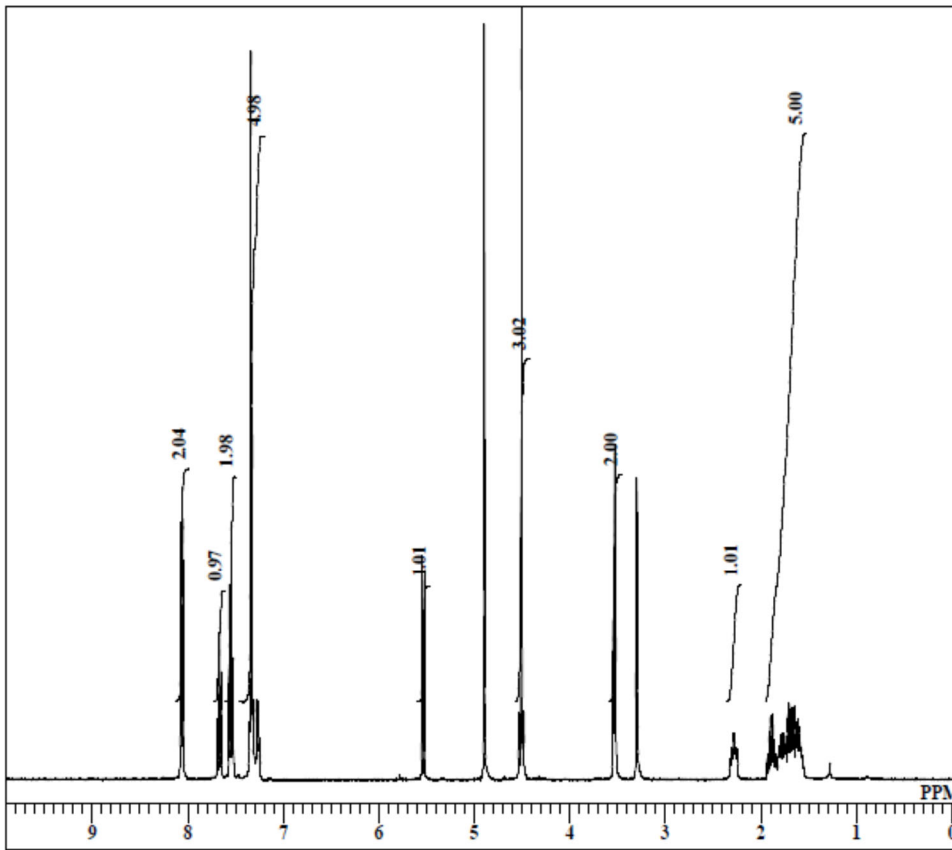

DFILE 20210117 AntiCl-Phenyl-1H.  
 COMNT 20210117 AntiCl-Phenyl-1H  
 DATIM Sun Jan 17 15:59:52 2021  
 OBNUC 1H  
 EXMOD NON  
 OBFRQ 399.65 MHz  
 OBSET 124.00 KHz  
 OBFIN 10500.00 Hz  
 POINT 16384  
 FREQU 7992.01 Hz  
 SCANS 8  
 ACQTM 2.0500 sec  
 PD 4.9500 sec  
 PWI 6.00 usec  
 IRNUC 1H  
 CTEMP 17.4 c  
 SLVNT CD3OD  
 EXREF 3.30 ppm  
 BF 0.12 Hz  
 RGAIN 21

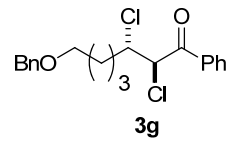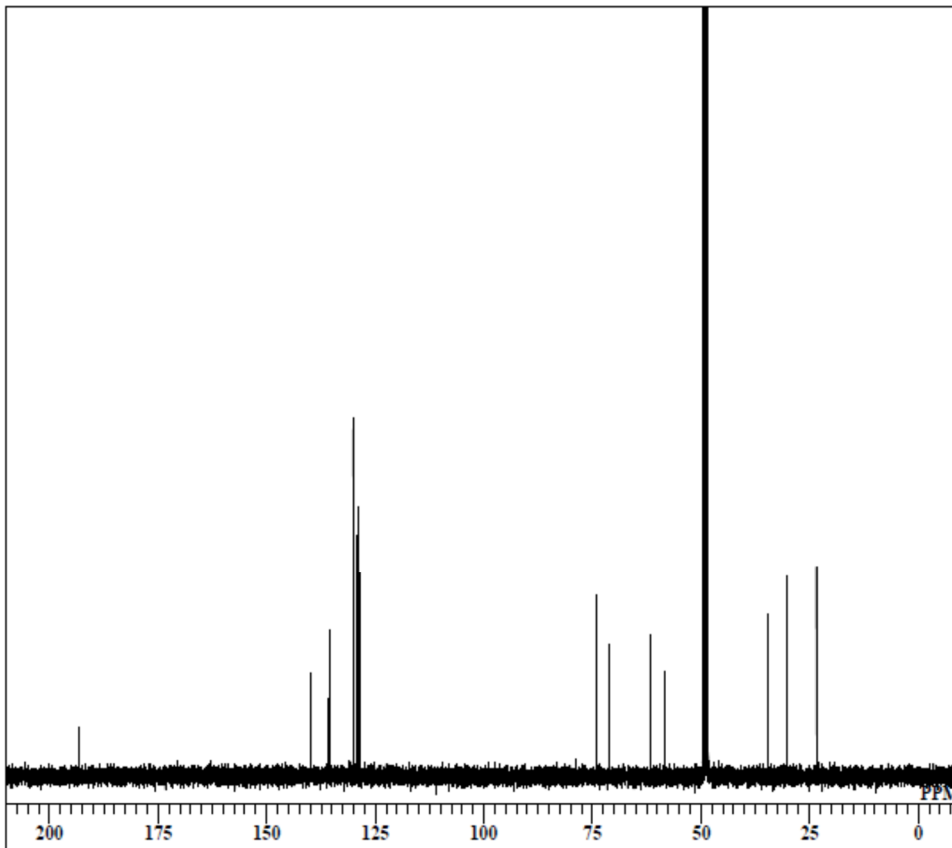

DFILE 20210117 AntiCl-Phenyl-13C  
 COMNT 20210117 AntiCl-Phenyl-13C  
 DATIM Sun Jan 17 17:21:08 2021  
 OBNUC 13C  
 EXMOD BCM  
 OBFRQ 100.40 MHz  
 OBSET 125.00 KHz  
 OBFIN 10500.00 Hz  
 POINT 32768  
 FREQU 27118.64 Hz  
 SCANS 1536  
 ACQTM 1.2083 sec  
 PD 1.7920 sec  
 PWI 5.00 usec  
 IRNUC 1H  
 CTEMP 14.9 c  
 SLVNT CD3OD  
 EXREF 49.00 ppm  
 BF 0.12 Hz  
 RGAIN 28

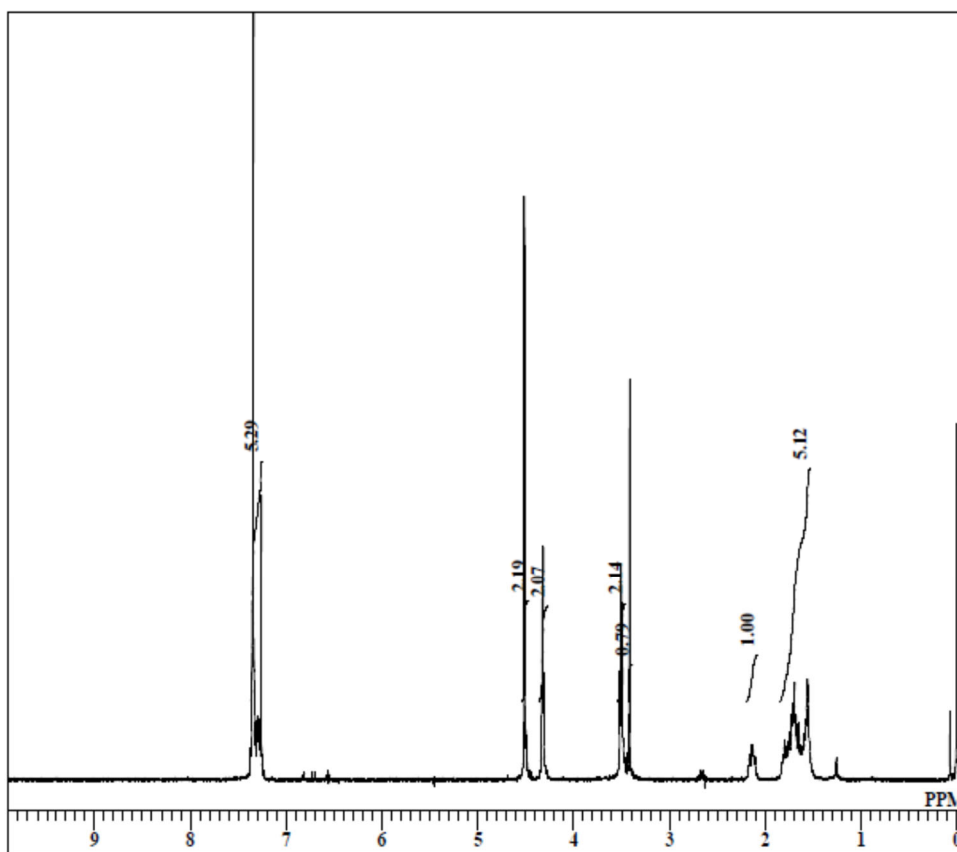

DFILE 20210620 AntiCl-ethynyl 1H.  
 COMENT 20210620 AntiCl-ethynyl 1H  
 DATIM Sun Jun 20 21:10:32 2021  
 OBNUC 1H  
 EXMOD NON  
 OBFRQ 399.65 MHz  
 OBSET 124.00 KHz  
 OBFIN 10500.00 Hz  
 POINT 16384  
 FREQU 7992.01 Hz  
 SCANS 4  
 ACQTM 2.0500 sec  
 PD 4.9500 sec  
 PW1 6.00 usec  
 IRNUC 1H  
 CTEMP 22.1 c  
 SLVNT CDCL3  
 EXREF 0.00 ppm  
 BF 0.10 Hz  
 RGAIN 24

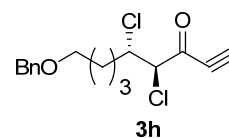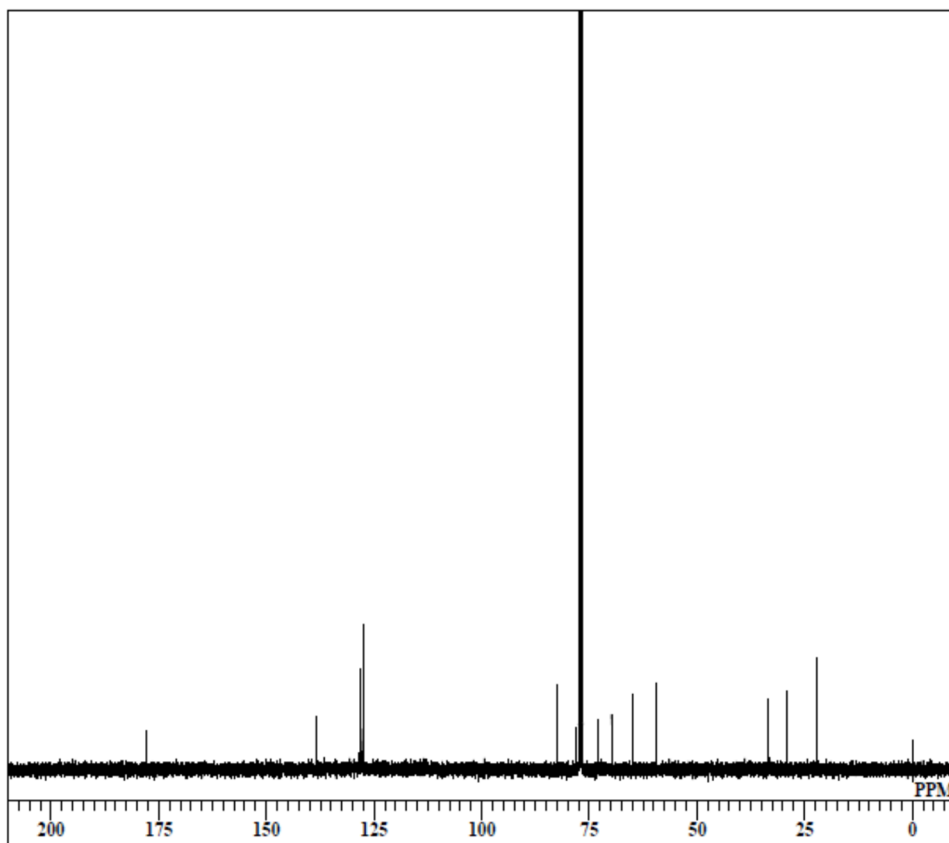

DFILE 20210620 AntiCl-ethynyl-13C.  
 COMENT 20210620 AntiCl-ethynyl-13C  
 DATIM Tue Jun 22 00:22:19 2021  
 OBNUC 13C  
 EXMOD BCM  
 OBFRQ 100.40 MHz  
 OBSET 125.00 KHz  
 OBFIN 10500.00 Hz  
 POINT 32768  
 FREQU 27118.64 Hz  
 SCANS 5400  
 ACQTM 1.2083 sec  
 PD 1.7920 sec  
 PW1 5.00 usec  
 IRNUC 13C  
 CTEMP 21.3 c  
 SLVNT CDCL3  
 EXREF 77.00 ppm  
 BF 0.10 Hz  
 RGAIN 29

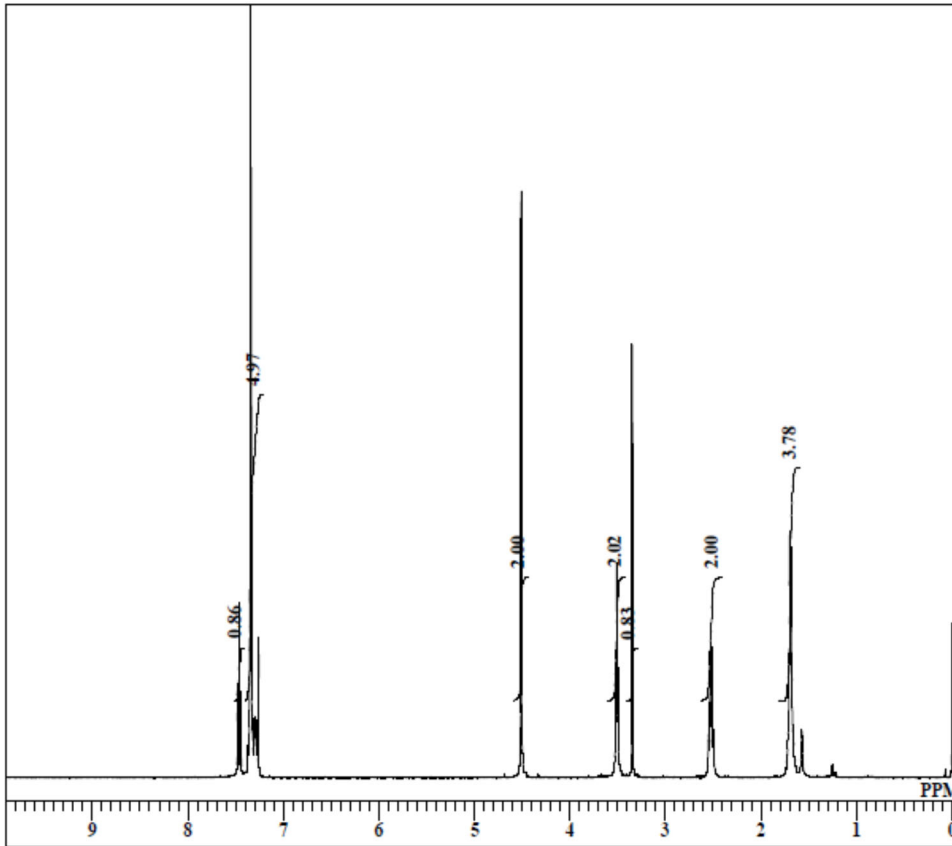

DFILE 20210529 AntiCl-Ethynyl 1H  
 COMNT 20210529 AntiCl-Ethynyl 1H  
 DATIM Sun May 30 19:16:38 2021  
 OBNUC 1H  
 EXMOD NON  
 OBFREQ 399.65 MHz  
 OBSET 124.00 KHz  
 OBFIN 10500.00 Hz  
 POINT 16384  
 FREQU 7992.01 Hz  
 SCANS 8  
 ACQTM 2.0500 sec  
 PD 4.9500 sec  
 PW1 6.00 usec  
 IRNUC 1H  
 CTEMP 22.7 c  
 SLVNT CDCL3  
 EXREF 0.00 ppm  
 BF 0.10 Hz  
 RGAIN 21

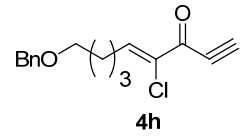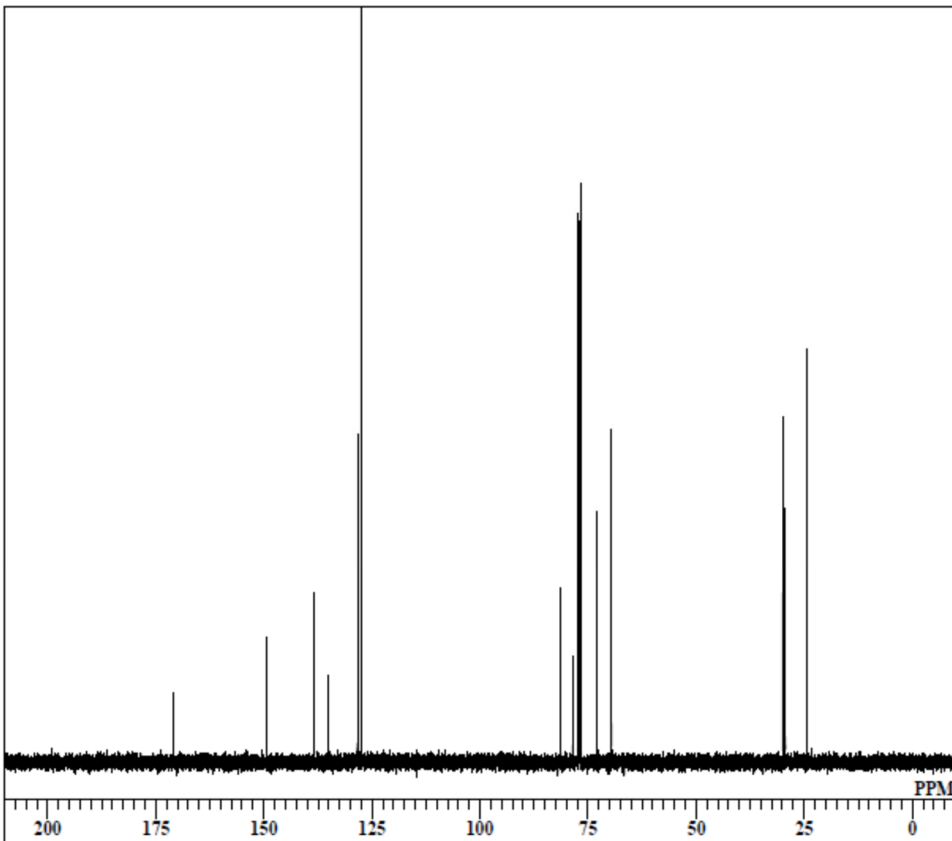

DFILE 20210529 AntiCl-Ethynyl 13 C  
 COMNT 20210529 AntiCl-Ethynyl 13C  
 DATIM Sat May 29 15:59:43 2021  
 OBNUC 13C  
 EXMOD BCM  
 OBFREQ 100.40 MHz  
 OBSET 125.00 KHz  
 OBFIN 10500.00 Hz  
 POINT 32768  
 FREQU 27118.64 Hz  
 SCANS 700  
 ACQTM 1.2083 sec  
 PD 1.7920 sec  
 PW1 5.00 usec  
 IRNUC 1H  
 CTEMP 20.9 c  
 SLVNT CDCL3  
 EXREF 77.00 ppm  
 BF 0.10 Hz  
 RGAIN 29

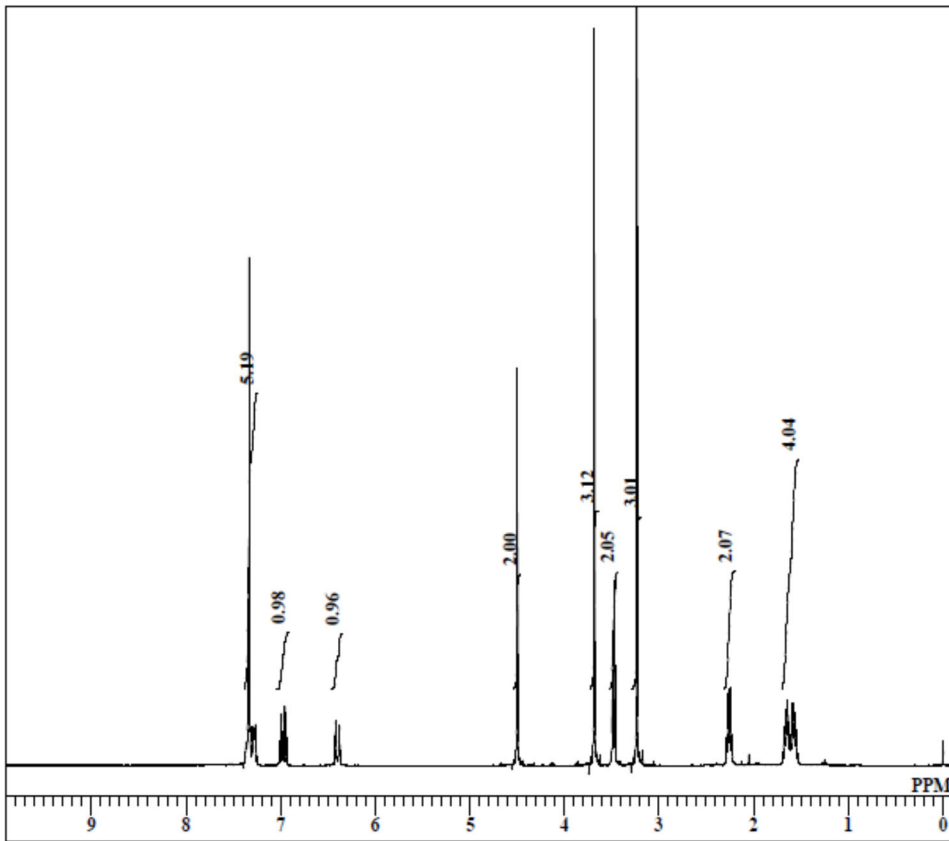

DFILE 20210107 AntiCl-iPrMgBr-1H.  
 COMINT 20210107 AntiCl-iPrMgBr-1H  
 DATIM Thu Jan 07 14:02:20 2021  
 1H  
 EXMOD NON  
 OBFRQ 399.65 MHz  
 OBSET 124.00 KHz  
 OBFIN 10500.00 Hz  
 POINT 16384  
 FREQU 7992.01 Hz  
 SCANS 4  
 ACQTM 2.0500 sec  
 PD 4.9500 sec  
 PW1 6.00 usec  
 IRNUC 1H  
 CTEMP 16.4 c  
 SLVNT CDCL3  
 EXREF 0.00 ppm  
 BF 0.12 Hz  
 RGAIN 14

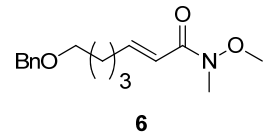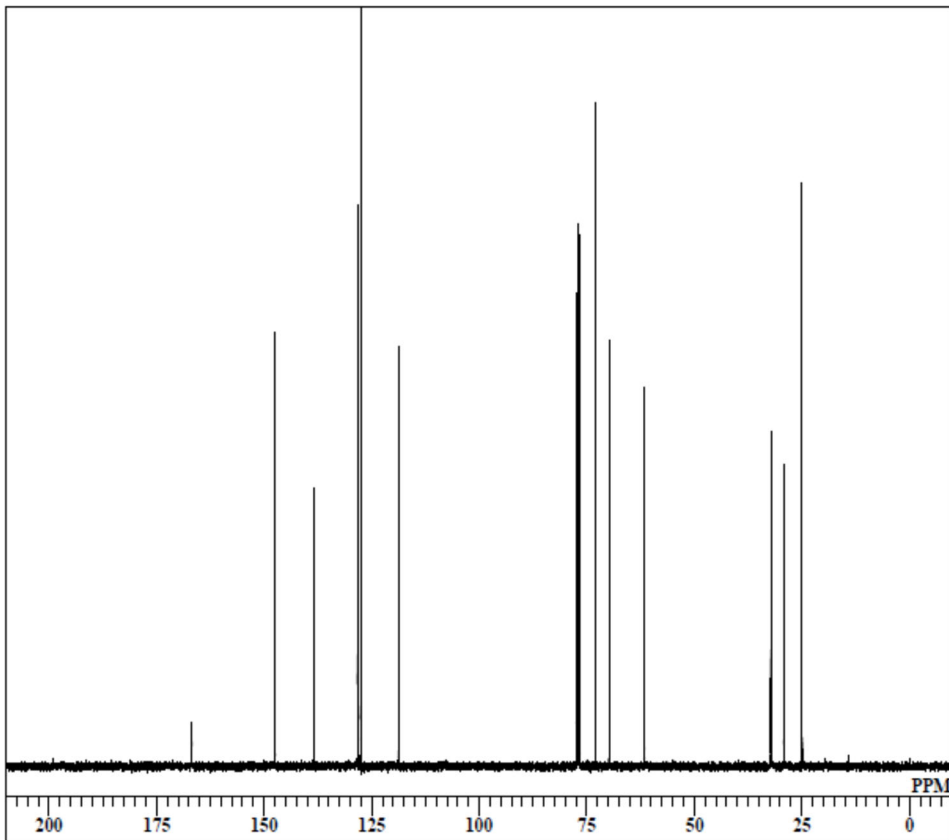

DFILE 20210107 AntiCl-iPrMgBr-13C  
 COMINT 20210107 AntiCl-iPrMgBr-13C  
 DATIM Thu Jan 07 20:37:55 2021  
 13C  
 EXMOD BCM  
 OBFRQ 100.40 MHz  
 OBSET 125.00 KHz  
 OBFIN 10500.00 Hz  
 POINT 32768  
 FREQU 27118.64 Hz  
 SCANS 2400  
 ACQTM 1.2083 sec  
 PD 1.7920 sec  
 PW1 5.00 usec  
 IRNUC 13C  
 CTEMP 13.9 c  
 SLVNT CDCL3  
 EXREF 77.00 ppm  
 BF 0.12 Hz  
 RGAIN 28



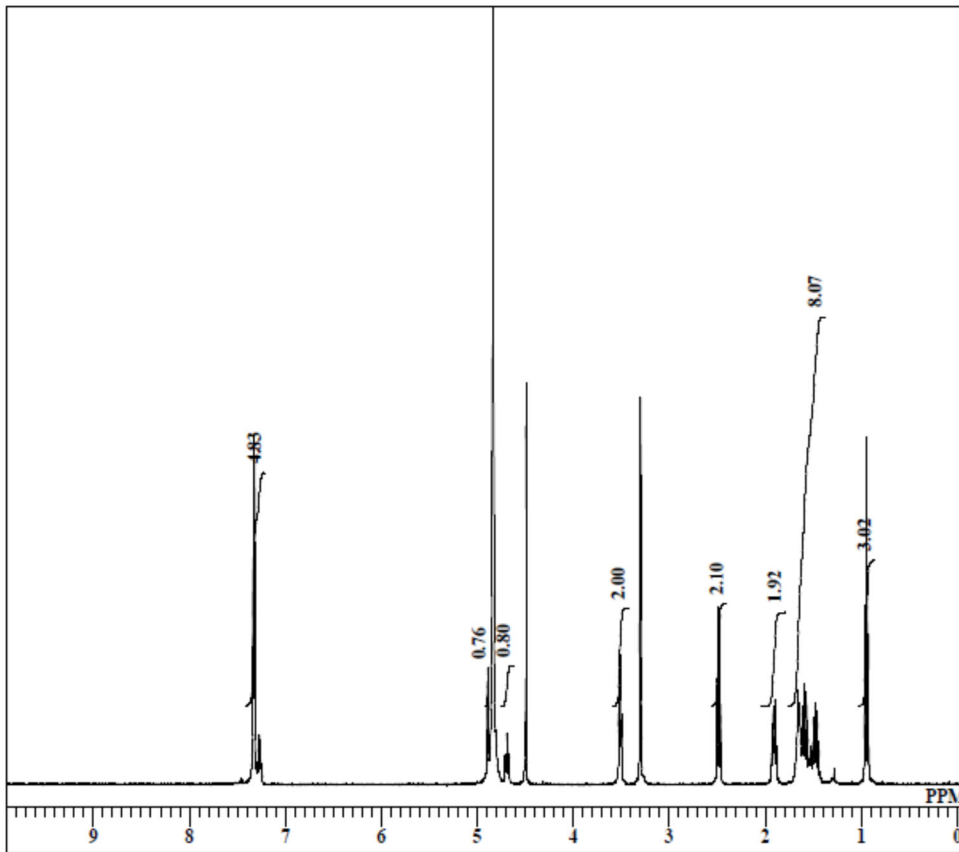

DFILE 20210203 SynCl-Hex 1H.als  
 COMNT 20210203 SynCl-Hex 1H  
 DATIM Wed Feb 03 20:08:36 2021  
 OBNUC 1H  
 EXMOD NON  
 OBFREQ 399.65 MHz  
 OBSET 124.00 KHz  
 OBFIN 10500.00 Hz  
 POINT 16384  
 FREQU 7992.01 Hz  
 SCANS 8  
 ACQTM 2.0500 sec  
 PD 4.9500 sec  
 PW1 6.00 usec  
 IRNUC 1H  
 CTEMP 24.0 c  
 SLVNT CD3OD  
 EXREF 3.30 ppm  
 BF 0.00 Hz  
 RGAIN 20

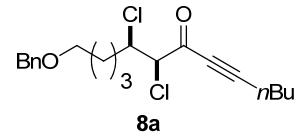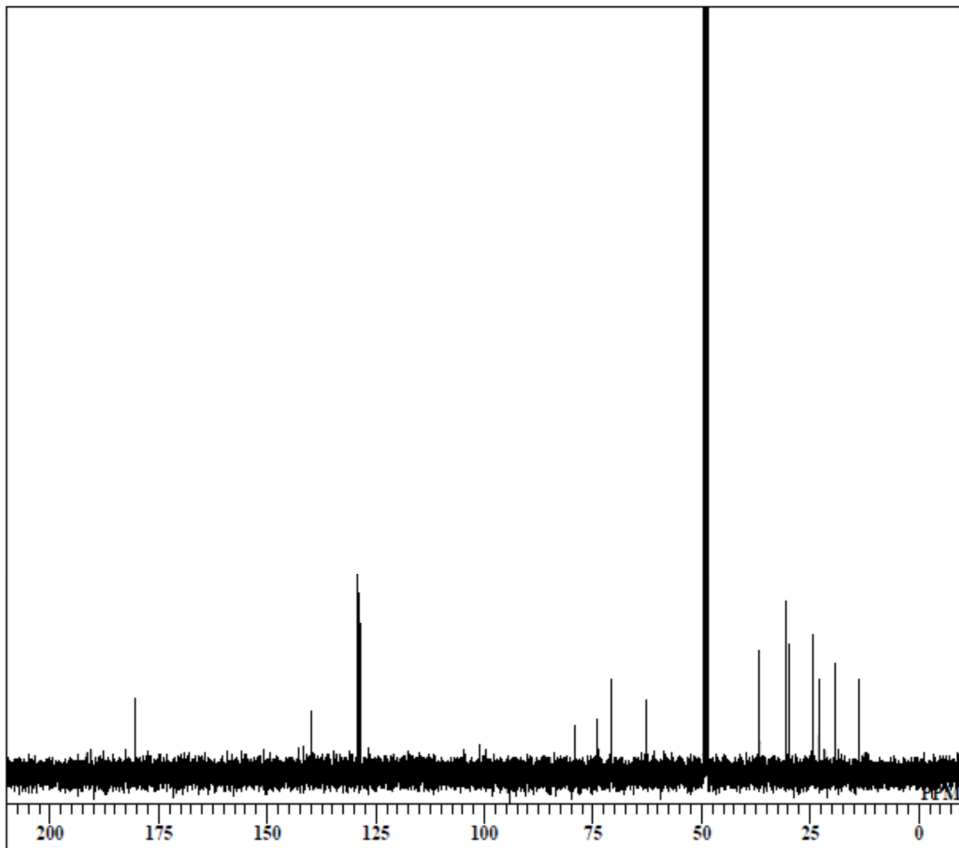

DFILE 20210203 SynCl-Hex 13C.als  
 COMNT 20210203 SynCl-Hex 13C  
 DATIM Wed Feb 03 22:15:47 2021  
 OBNUC 13C  
 EXMOD BCM  
 OBFREQ 100.40 MHz  
 OBSET 125.00 KHz  
 OBFIN 10500.00 Hz  
 POINT 32768  
 FREQU 27118.64 Hz  
 SCANS 2400  
 ACQTM 1.2083 sec  
 PD 1.7920 sec  
 PW1 5.00 usec  
 IRNUC 1H  
 CTEMP 21.7 c  
 SLVNT CD3OD  
 EXREF 49.00 ppm  
 BF 0.00 Hz  
 RGAIN 29

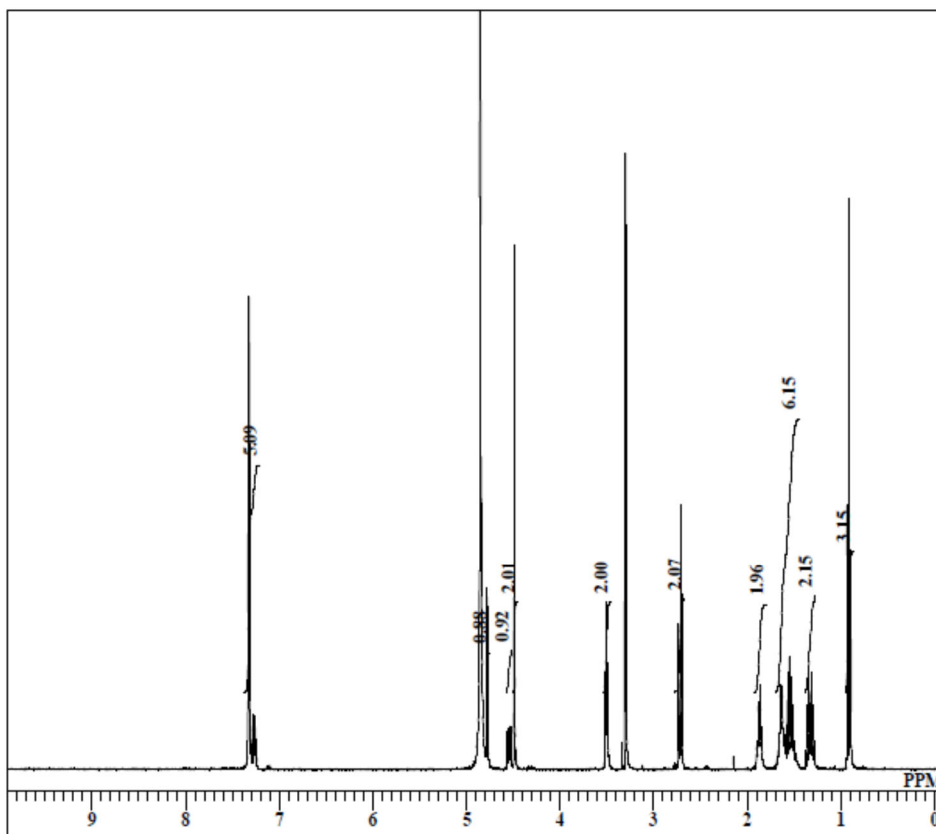

DFILE 20210202 SynCl-nBu1.als  
 COMNT 20210202 SynCl-nBu  
 DATIM Tue Feb 02 18:15:38 2021  
 IH  
 OBNUC NON  
 EXMOD NON  
 OBFREQ 399.65 MHz  
 OBSET 124.00 KHz  
 OBFIN 10500.00 Hz  
 POINT 16384  
 FREQU 7992.01 Hz  
 SCANS 8  
 ACQTM 2.0500 sec  
 PD 4.9500 sec  
 PW1 6.00 usec  
 IRNUC IH  
 CTEMP 22.0 c  
 SLVNT CD3OD  
 EXREF 3.30 ppm  
 BF 0.00 Hz  
 RGAIN 20

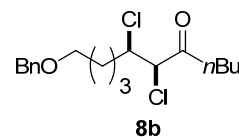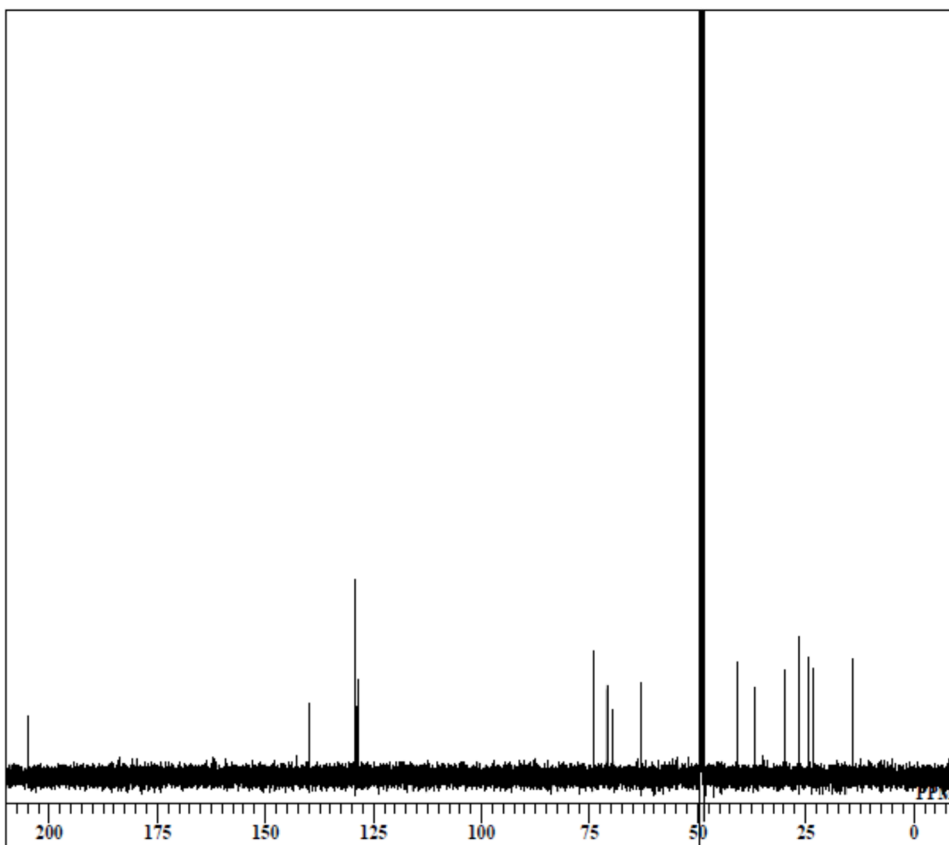

DFILE 20210202 SynCl-nBu13Cl.als  
 COMNT 20210202 SynCl-nBu13C  
 DATIM Tue Feb 02 20:21:04 2021  
 I3C  
 OBNUC BCM  
 EXMOD BCM  
 OBFREQ 100.40 MHz  
 OBSET 125.00 KHz  
 OBFIN 10500.00 Hz  
 POINT 32768  
 FREQU 27118.64 Hz  
 SCANS 2400  
 ACQTM 1.2083 sec  
 PD 1.7920 sec  
 PW1 5.00 usec  
 IRNUC IH  
 CTEMP 21.6 c  
 SLVNT CD3OD  
 EXREF 49.00 ppm  
 BF 0.00 Hz  
 RGAIN 29

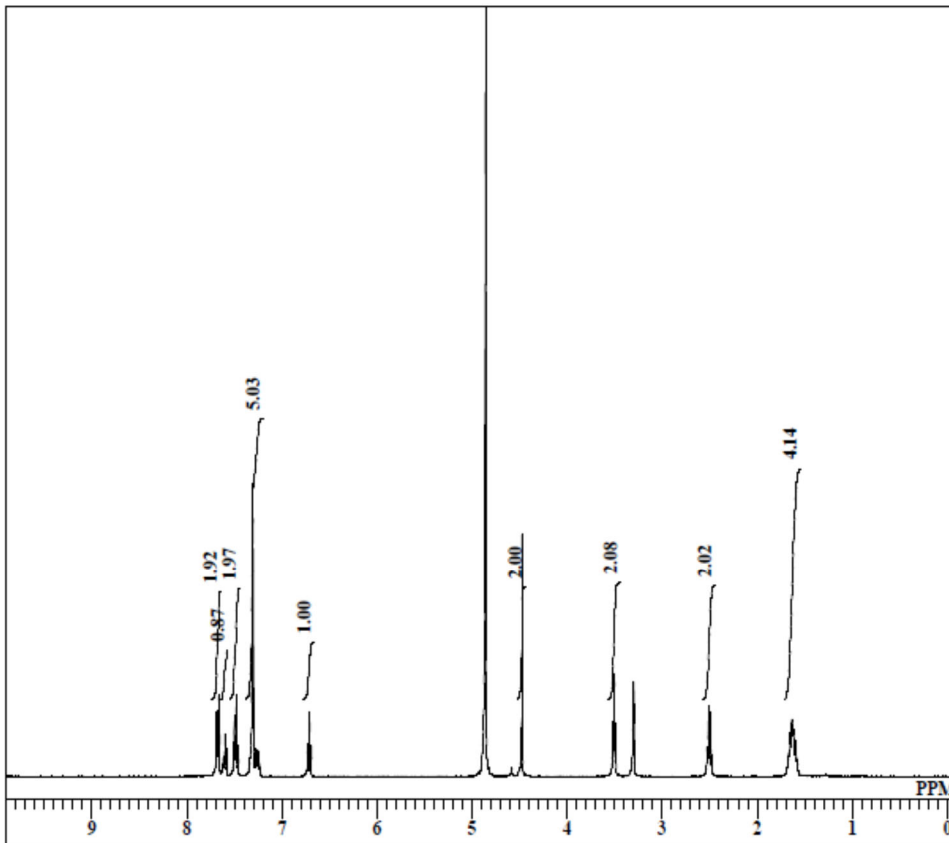

DFILE 20210208 SynCl Ph-Li 1H.als  
 COMNT 20210208 SynCl Ph-Li 1H  
 DATIM Mon Feb 08 11:54:11 2021  
 1H  
 OBNUC 1H  
 EXMOD NON  
 OBFRQ 399.65 MHz  
 OBSET 124.00 KHz  
 OBFIN 10500.00 Hz  
 POINT 16384  
 FREQU 7992.01 Hz  
 SCANS 8  
 ACQTM 2.0500 sec  
 PD 4.9500 sec  
 PW1 6.00 usec  
 IRNUC 1H  
 CTEMP 22.0 c  
 SLVNT CD3OD  
 EXREF 3.30 ppm  
 BF 0.12 Hz  
 RGAIN 18

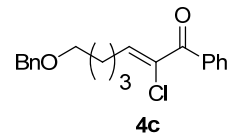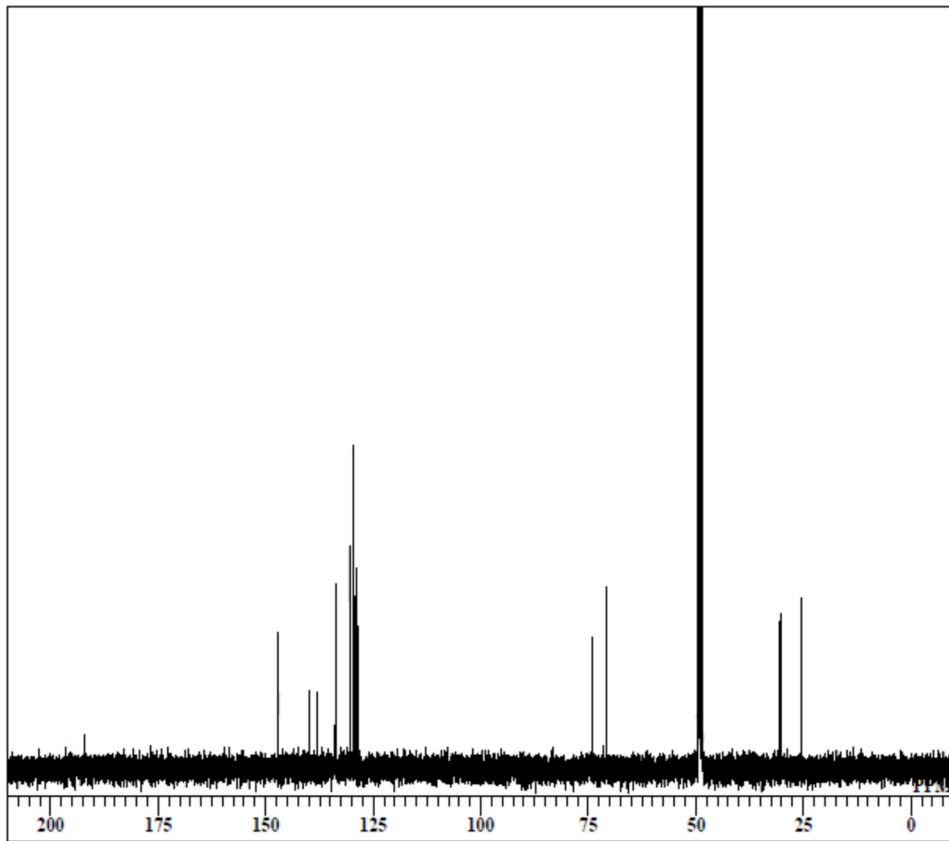

DFILE 20210208 SynCl Ph-Li 13C.als  
 COMNT 20210208 SynCl Ph-Li 13C  
 DATIM Mon Feb 08 22:52:23 2021  
 13C  
 OBNUC 13C  
 EXMOD BCM  
 OBFRQ 100.40 MHz  
 OBSET 125.00 KHz  
 OBFIN 10500.00 Hz  
 POINT 32768  
 FREQU 27118.64 Hz  
 SCANS 2500  
 ACQTM 1.2083 sec  
 PD 1.7920 sec  
 PW1 5.00 usec  
 IRNUC 1H  
 CTEMP 22.0 c  
 SLVNT CD3OD  
 EXREF 49.00 ppm  
 BF 0.12 Hz  
 RGAIN 29

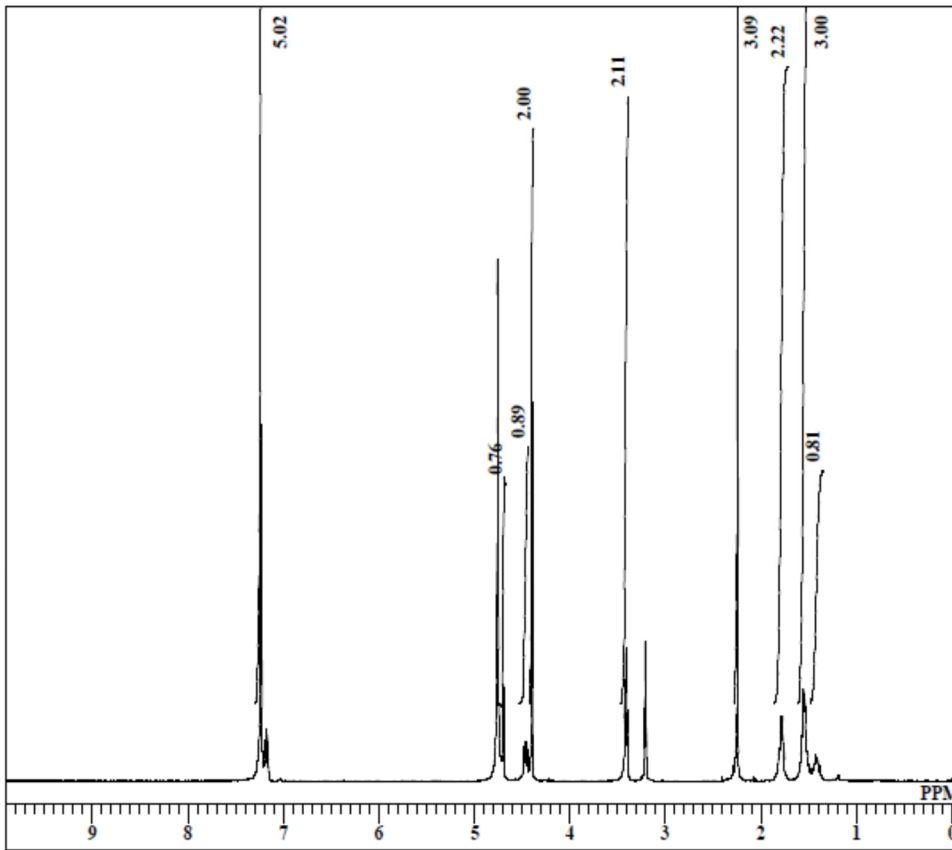

DFILE 20210205 SynCl-Methyl- 1H.  
 COMNT 20210205 SynCl-Methyl 1H  
 DATIM Fri Feb 05 16:13:44 2021  
 OBNUC 1H  
 EXMOD NON  
 OBFREQ 399.65 MHz  
 OBSET 124.00 KHz  
 OBFIN 10500.00 Hz  
 POINT 16384  
 FREQU 7992.01 Hz  
 SCANS 8  
 ACQTM 2.0500 sec  
 PD 4.9500 sec  
 PWI 6.00 usec  
 IRNUC 1H  
 CTEMP 22.6 c  
 SLVNT CD3OD  
 EXREF 0.00 ppm  
 BF 0.12 Hz  
 RGAIN 19

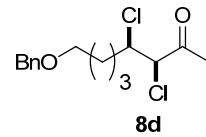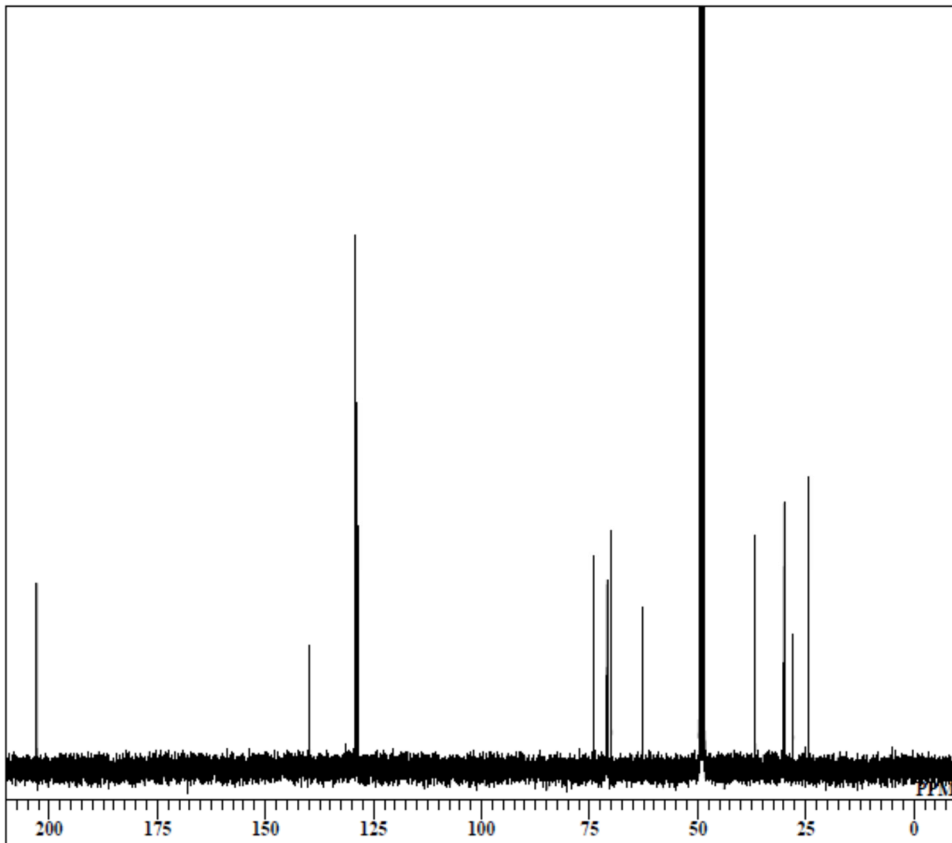

DFILE 20210205 SynCl-Methyl- 13C.  
 COMNT 20210205 SynCl-Methyl- 13C  
 DATIM Fri Feb 05 19:59:13 2021  
 OBNUC 13C  
 EXMOD BCM  
 OBFREQ 100.40 MHz  
 OBSET 125.00 KHz  
 OBFIN 10500.00 Hz  
 POINT 32768  
 FREQU 27118.64 Hz  
 SCANS 2400  
 ACQTM 1.2083 sec  
 PD 1.7920 sec  
 PWI 5.00 usec  
 IRNUC 1H  
 CTEMP 21.9 c  
 SLVNT CD3OD  
 EXREF 49.00 ppm  
 BF 0.12 Hz  
 RGAIN 29

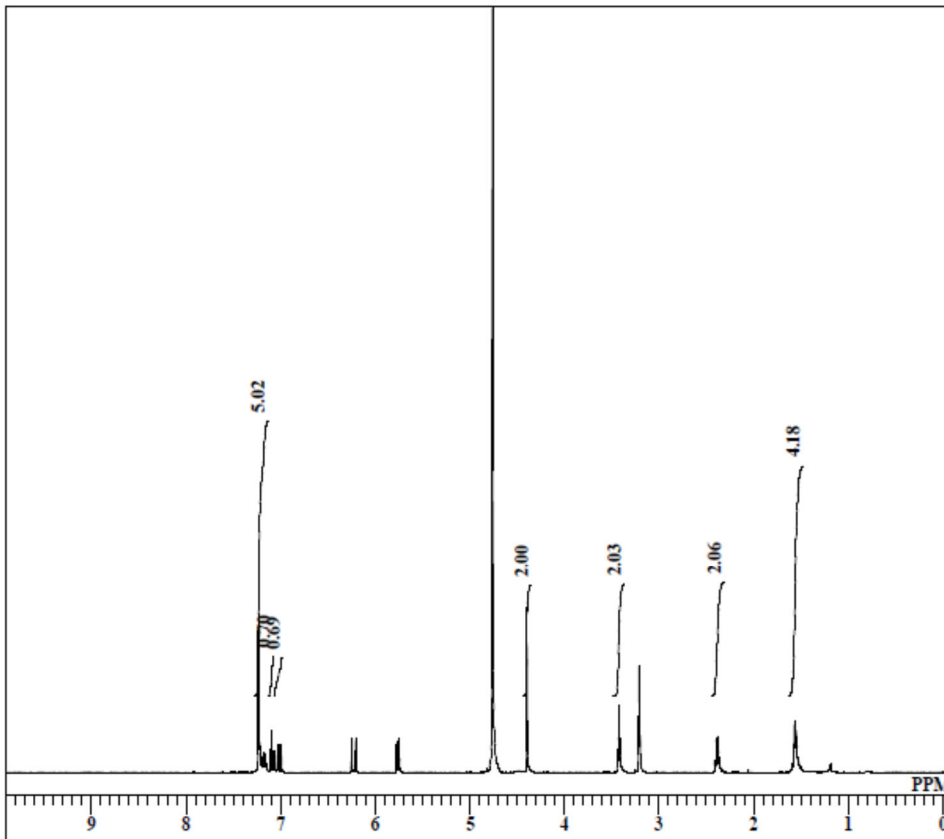

DFILE 20210206 SynCl-VinylMgX 1H  
 COMNT 20210208 SynCl-Vinyl-Li 1H  
 DATIM Mon Feb 08 11:40:06 2021  
 OBNUC 1H  
 EXMOD NON  
 OBFRQ 399.65 MHz  
 OBSET 124.00 KHz  
 OBFIN 10500.00 Hz  
 POINT 16384  
 FREQU 7992.01 Hz  
 SCANS 8  
 ACQIM 2.0500 sec  
 PD 4.9500 sec  
 PW1 6.00 usec  
 IRNUC 1H  
 CTEMP 22.7 c  
 SLVNT CD3OD  
 EXREF 0.00 ppm  
 BF 0.12 Hz  
 RGAIN 20

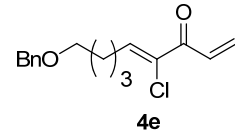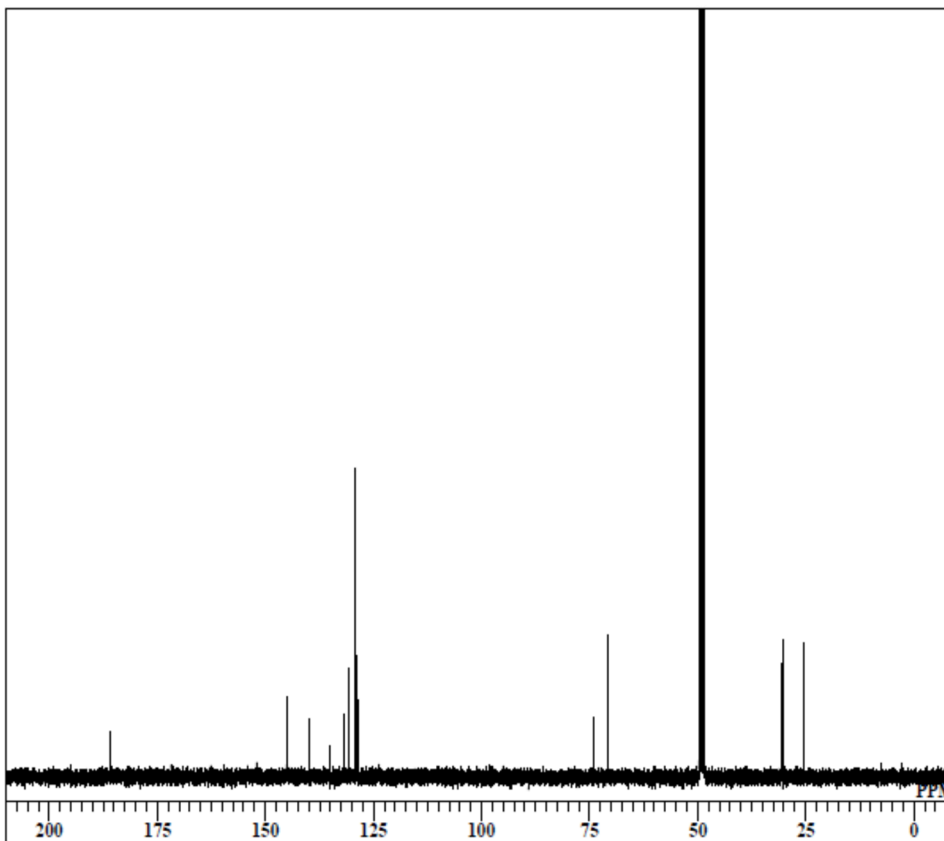

DFILE 20210206 SynCl-VinylMgX 13  
 COMNT 20210206 SynCl-VinylMgX 13  
 DATIM Mon Feb 08 20:16:10 2021  
 OBNUC 13C  
 EXMOD BCM  
 OBFRQ 100.40 MHz  
 OBSET 125.00 KHz  
 OBFIN 10500.00 Hz  
 POINT 32768  
 FREQU 27118.64 Hz  
 SCANS 3000  
 ACQIM 1.2083 sec  
 PD 1.7920 sec  
 PW1 5.00 usec  
 IRNUC 1H  
 CTEMP 22.0 c  
 SLVNT CD3OD  
 EXREF 49.00 ppm  
 BF 0.12 Hz  
 RGAIN 29

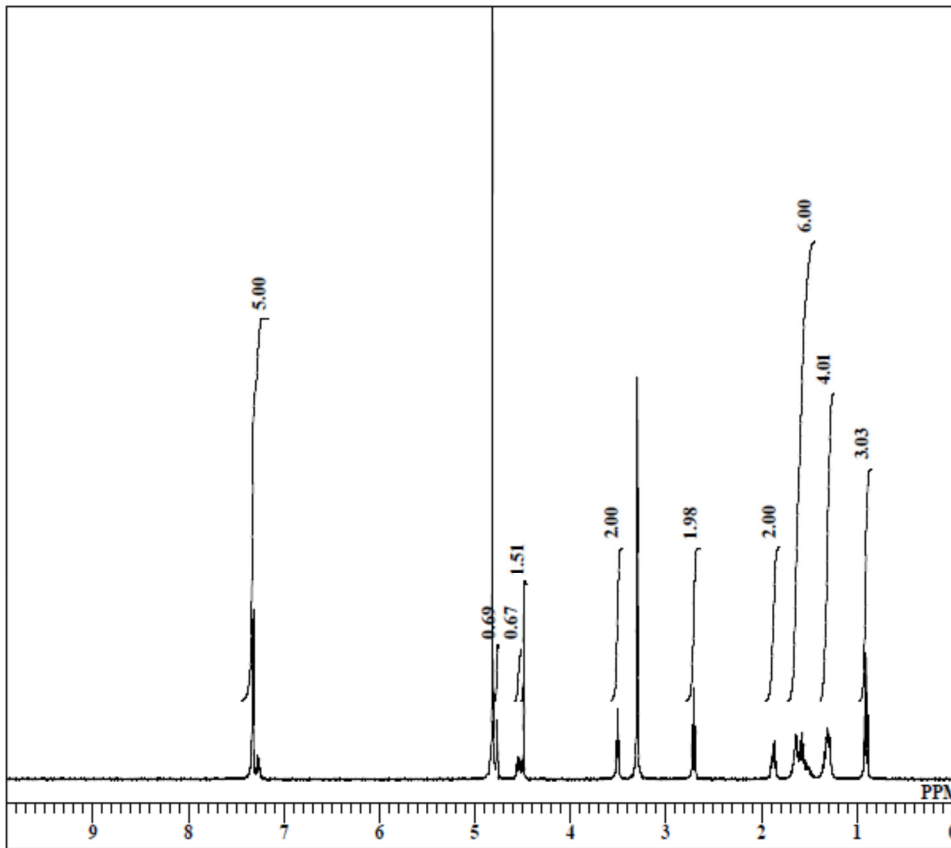

DFILE 20210223 SynCl-PentylMgX  
 COMNT 20210223 SynCl-PentylMgX  
 DATIM Tue Feb 23 21:10:22 2021  
 OBNUC 1H  
 EXMOD NON  
 OBFRQ 399.65 MHz  
 OBSET 124.00 KHz  
 OBFIN 10500.00 Hz  
 POINT 16384  
 FREQU 7992.01 Hz  
 SCANS 8  
 ACQTM 2.0500 sec  
 PD 4.9500 sec  
 PW1 6.00 usec  
 IRNUC 1H  
 CTEMP 26.2 c  
 SLVNT CD3OD  
 EXREF 3.30 ppm  
 BF 0.10 Hz  
 RGAIN 24

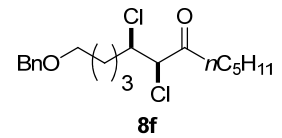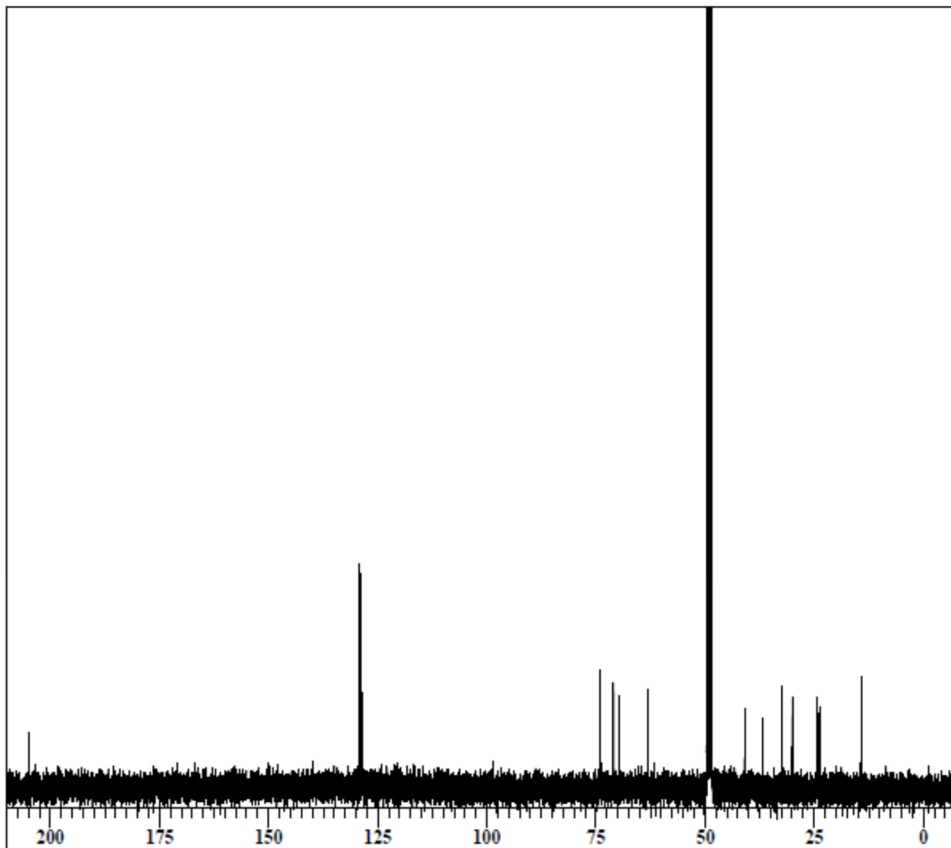

DFILE 20210223 SynCl-PentylMgX  
 COMNT 20210223 SynCl-PentylMgX  
 DATIM Wed Feb 24 05:37:53 2021  
 OBNUC 13C  
 EXMOD BCM  
 OBFRQ 100.40 MHz  
 OBSET 125.00 KHz  
 OBFIN 10500.00 Hz  
 POINT 32768  
 FREQU 27118.64 Hz  
 SCANS 10000  
 ACQTM 1.2083 sec  
 PD 1.7920 sec  
 PW1 5.00 usec  
 IRNUC 1H  
 CTEMP 22.8 c  
 SLVNT CD3OD  
 EXREF 49.00 ppm  
 BF 0.10 Hz  
 RGAIN 29

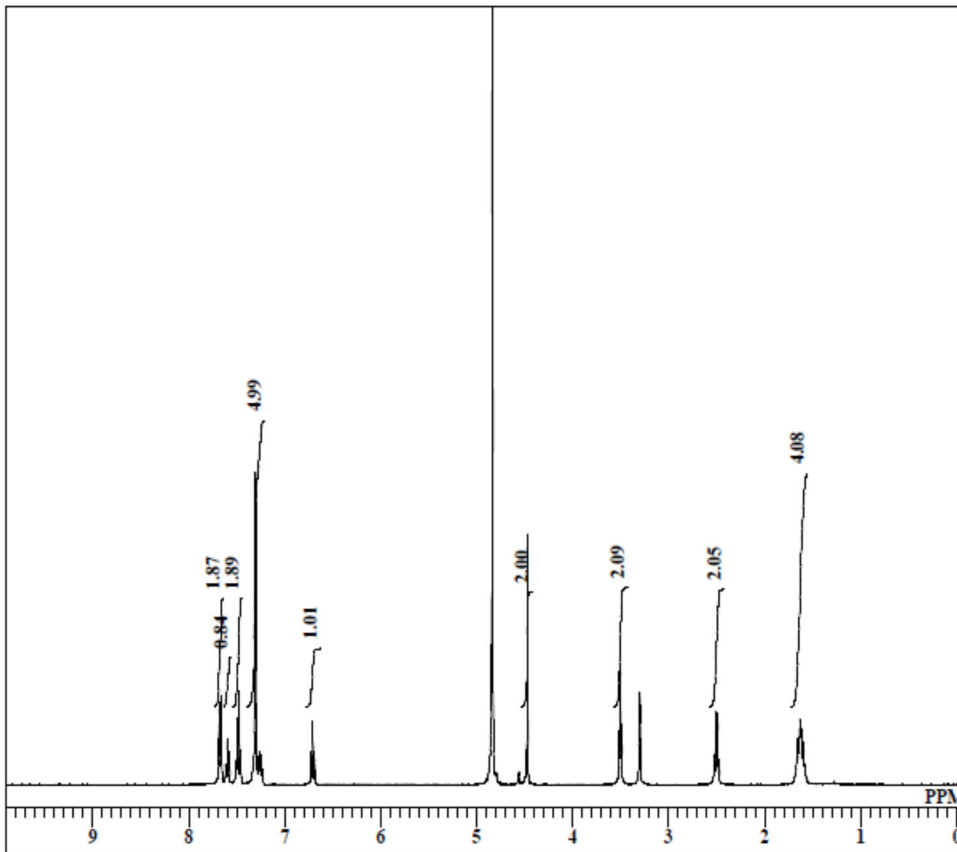

DFILE 20210207 SynCl PhMgX 1H.  
 COMNT 20210207 SynCl-PhMgX 1H  
 DATIM Sun Feb 07 19:36:34 2021  
 OBNUC 1H  
 EXMOD NON  
 OBFRQ 399.65 MHz  
 OBSET 124.00 KHz  
 OBFIN 10500.00 Hz  
 POINT 16384  
 FREQU 7992.01 Hz  
 SCANS 8  
 ACQTM 2.0500 sec  
 PD 4.9500 sec  
 PW1 6.00 usec  
 IRNUC 1H  
 CTEMP 24.1 c  
 SLVNT CD3OD  
 EXREF 3.30 ppm  
 BF 0.12 Hz  
 RGAIN 18

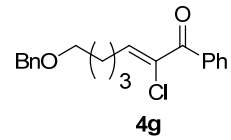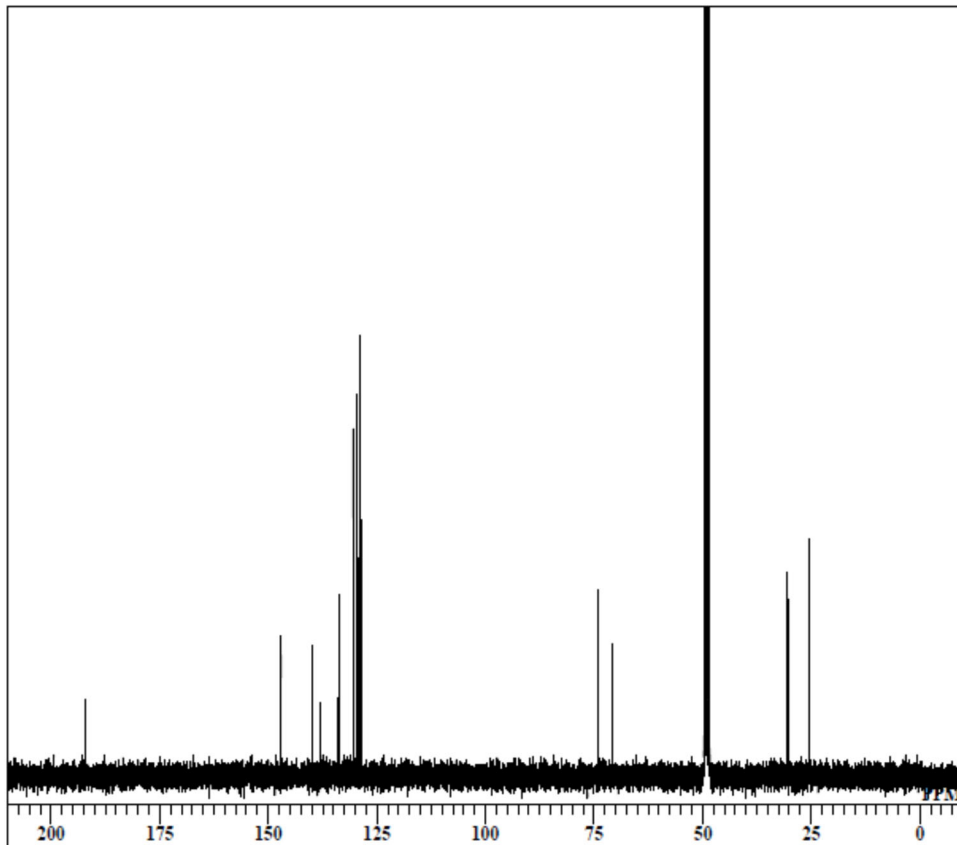

DFILE 20210207 SynCl PhMgX 13C  
 COMNT 20210207 SynCl PhMgX 13C  
 DATIM Sun Feb 07 21:46:12 2021  
 OBNUC 13C  
 EXMOD BCM  
 OBFRQ 100.40 MHz  
 OBSET 125.00 KHz  
 OBFIN 10500.00 Hz  
 POINT 32768  
 FREQU 27118.64 Hz  
 SCANS 2500  
 ACQTM 1.2083 sec  
 PD 1.7920 sec  
 PW1 5.00 usec  
 IRNUC 1H  
 CTEMP 22.4 c  
 SLVNT CD3OD  
 EXREF 49.00 ppm  
 BF 0.12 Hz  
 RGAIN 29
